# Supplementary material for: Mitochondrial Plasticity Promotes Resistance to Sorafenib and Vulnerability to STAT3 Inhibition in Human Hepatocellular Carcinoma
Source: MDPI journal article supplement (doi:10.3390/cancers13236029), 2021-11-30

Figure 3E

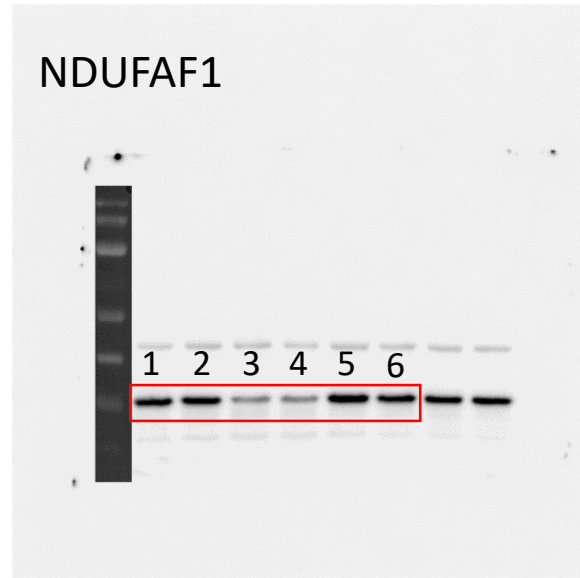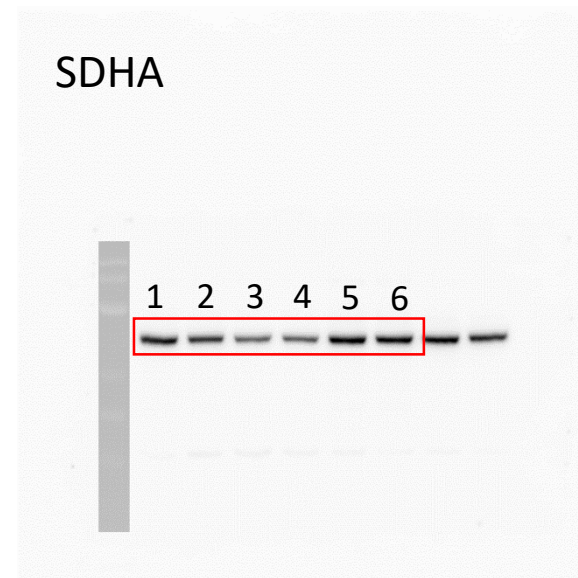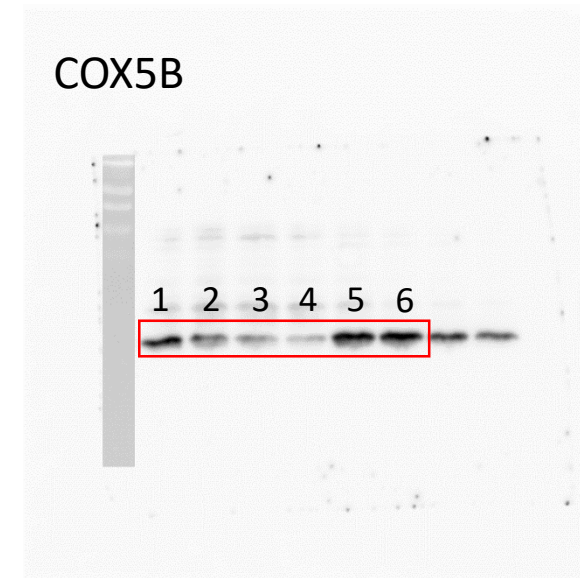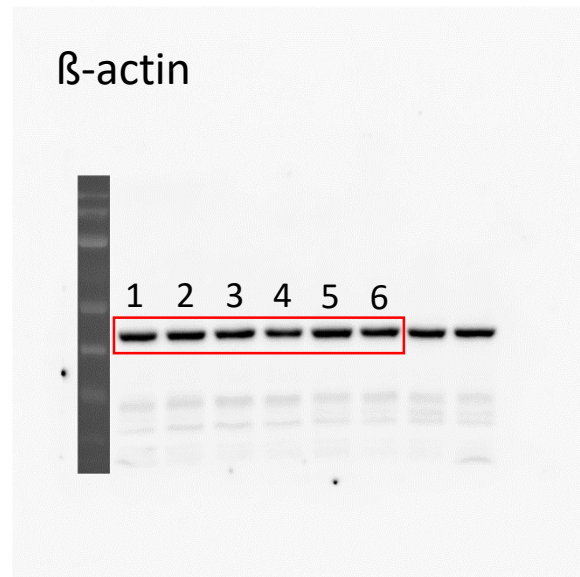

Figure 3F

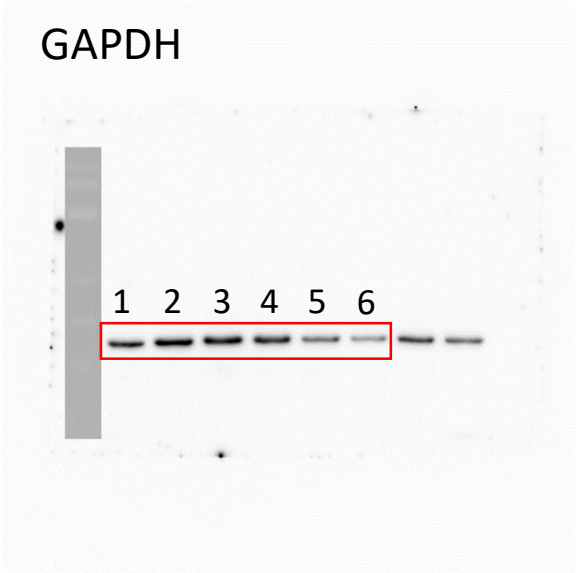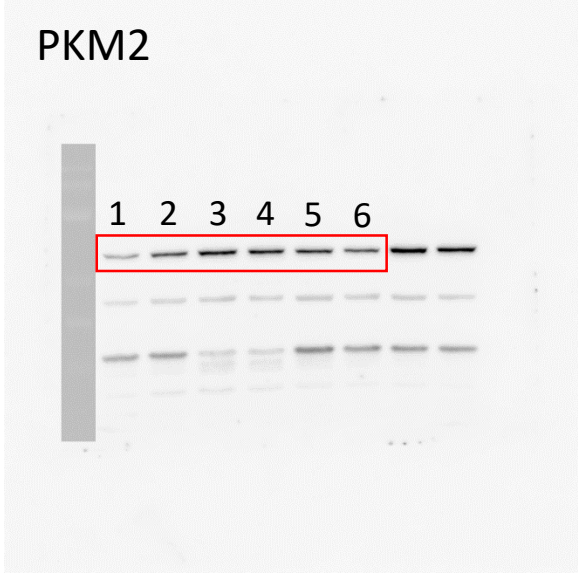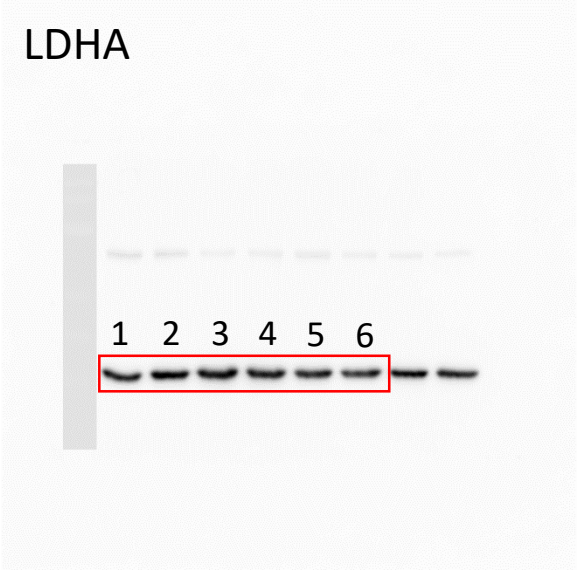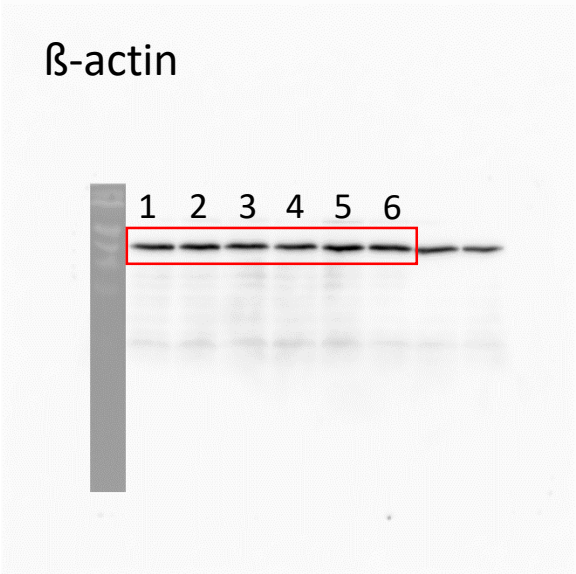



Figure 3G

COX5B

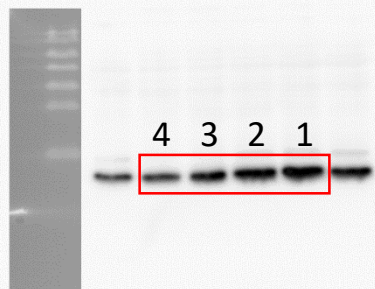

LDHA

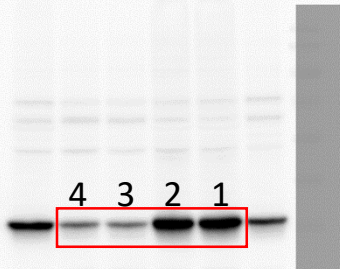

NDUFAF1

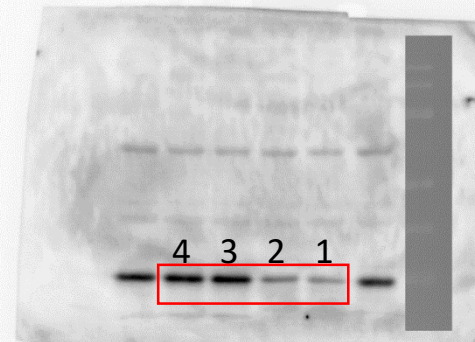

GAPDH

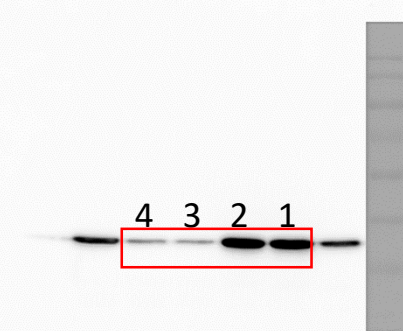

SDHA

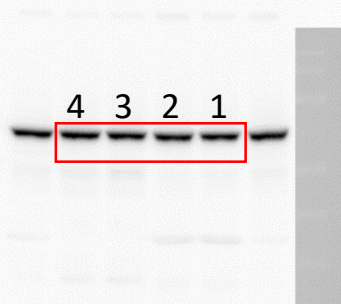

PKM2

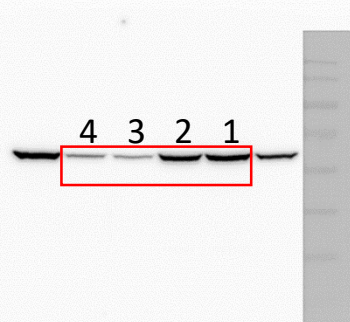

UQCRCQ

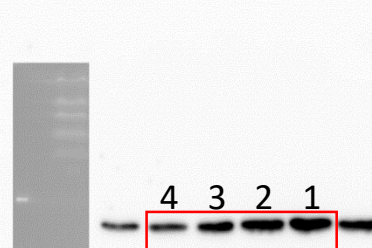

$\beta$ -actin

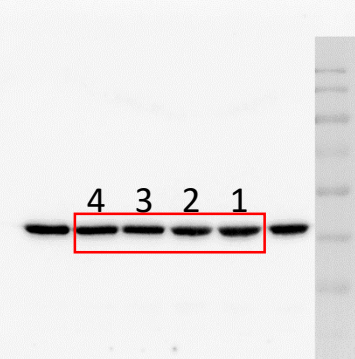

Figure 4A

pSer727 STAT3

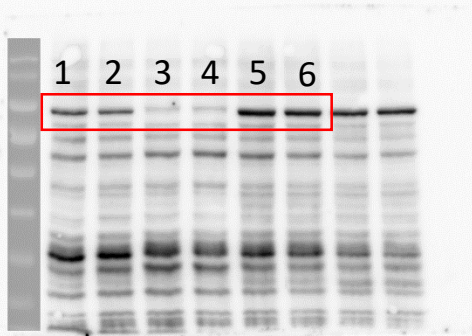

pTyr705 STAT3

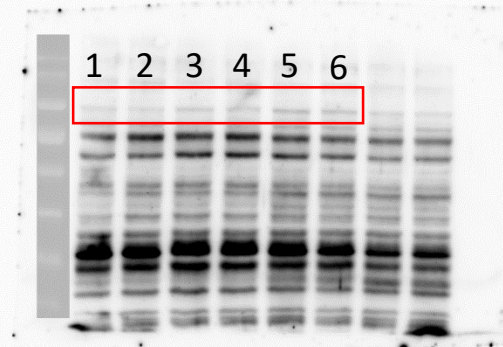

Total STAT3

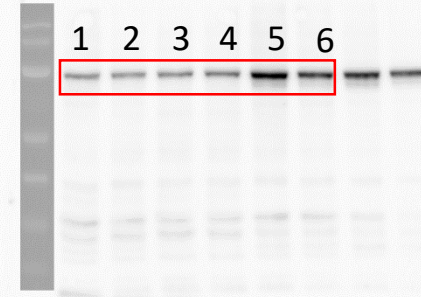

GRIM19

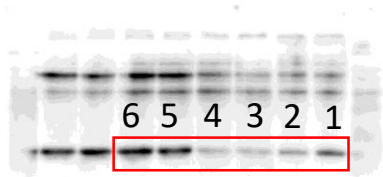

$\beta$ -actin

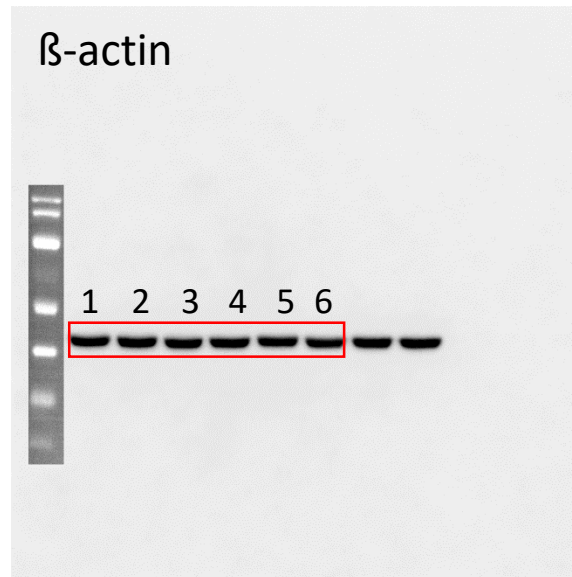



Figure 4B

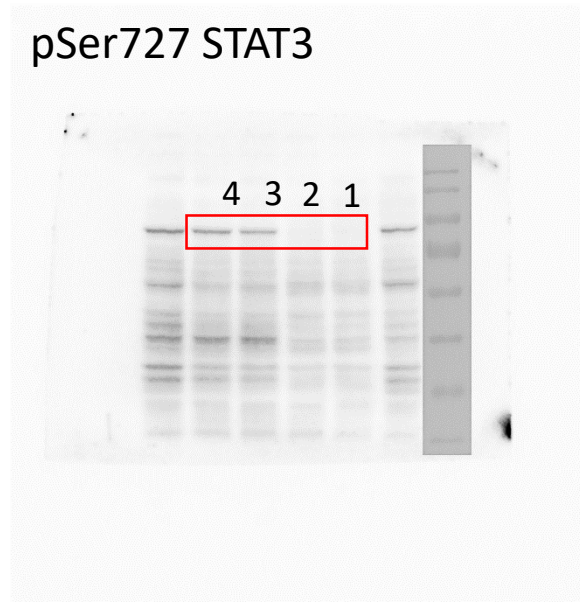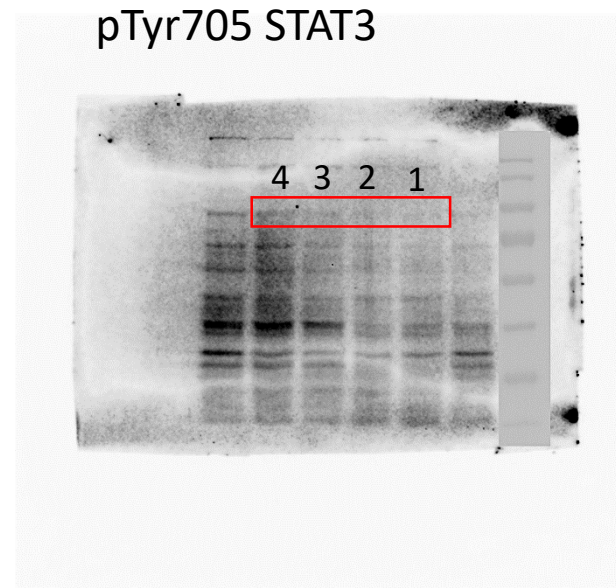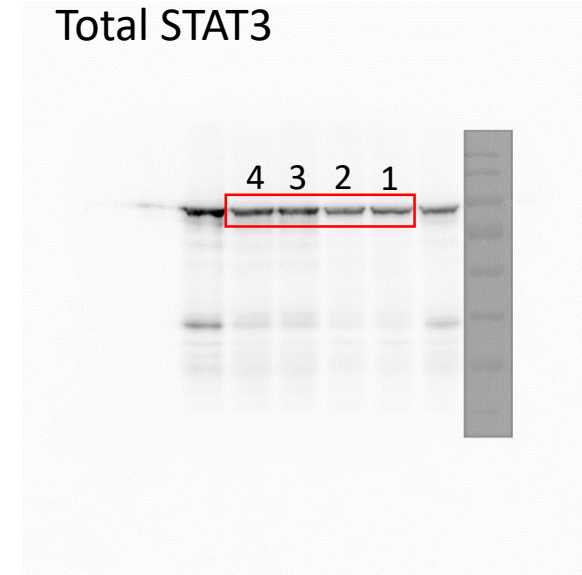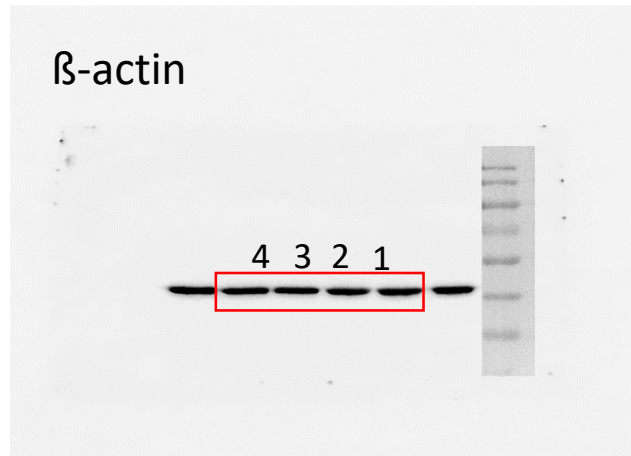

Figure 4C

Total STAT3

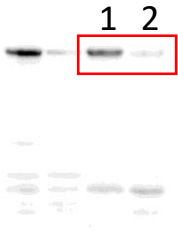

$\beta$ -actin

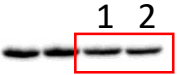

Figure 5B

Total STAT3

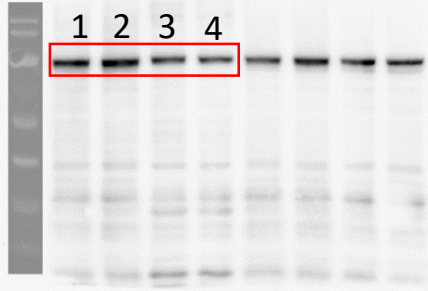

pSer727 STAT3

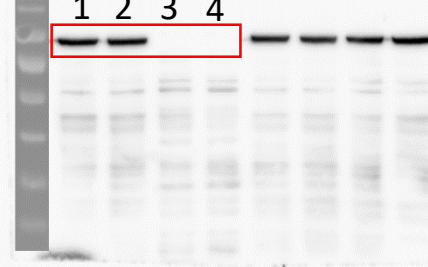

NDUFAF1

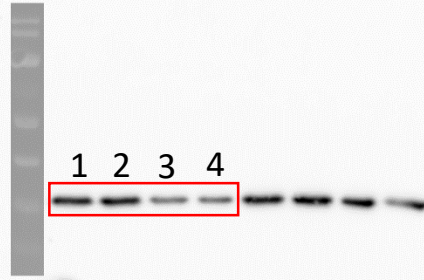

PKM2

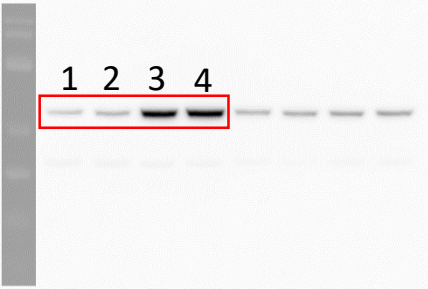

LDHA

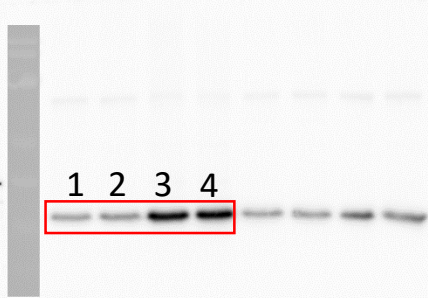

$\beta$ -actin

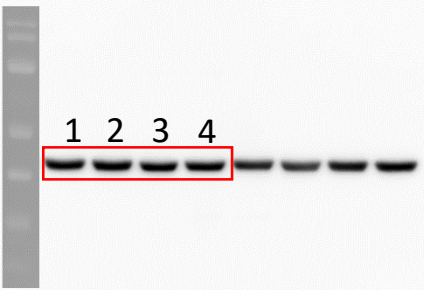

Supplement: s1 [file s1]
