# Supplementary material for: Mitochondrial Plasticity Promotes Resistance to Sorafenib and Vulnerability to STAT3 Inhibition in Human Hepatocellular Carcinoma
Source: MDPI journal article supplement (doi:10.3390/cancers13236029), 2021-11-30
Supplement: s1 [file s1]

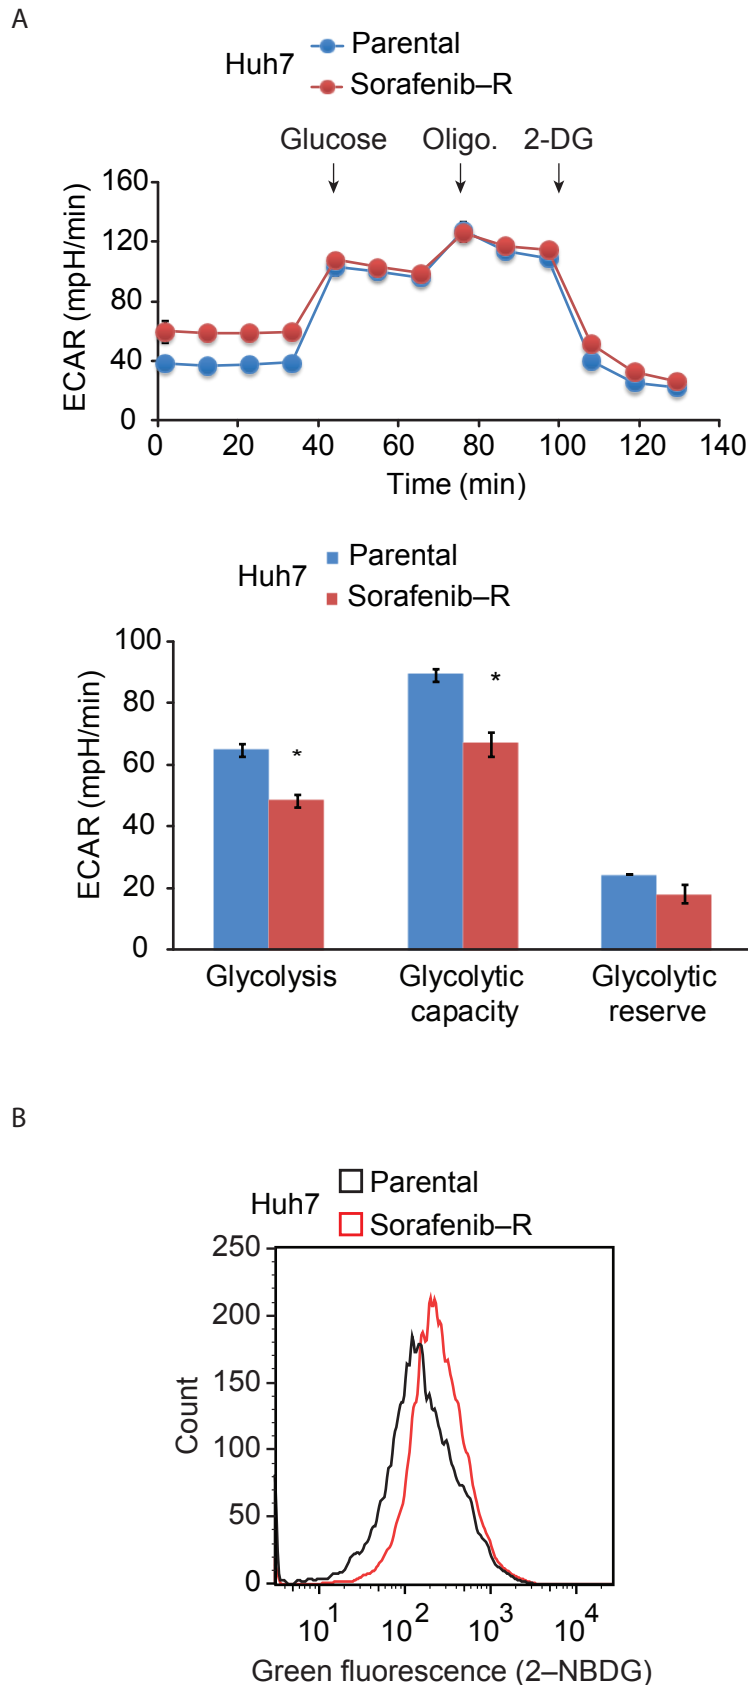

**Supplementary figure S5. Glycolytic metabolism in parental and sorafenib resistant Huh7 cells.** (A) Extracellular acidification rate (ECAR) assessed using Seahorse XFp analyzer in parental and sorafenib-resistant Huh7 cells. Top, real-time OCR measurements normalized to cell number. Bottom, basal and spare respiratory capacity based on OCR profiles. \*  $P \leq 0.05$ . (B) Glucose uptake assessed by flow cytometry analysis of 2-NBDG-stained parental and sorafenib-resistant Huh7 cells.
