# Supplementary material for: Mitochondrial Plasticity Promotes Resistance to Sorafenib and Vulnerability to STAT3 Inhibition in Human Hepatocellular Carcinoma
Source: MDPI journal article supplement (doi:10.3390/cancers13236029), 2021-11-30
Supplement: s1 [file s1]

A

|                              |                                                                                                                                         |
|------------------------------|-----------------------------------------------------------------------------------------------------------------------------------------|
| Standard name                | HALLMARK_IL6_JAK_STAT3_SIGNALING                                                                                                        |
| Systematic name              | M5897                                                                                                                                   |
| Brief description            | Genes up-regulated by IL6 [ <a href="#">GeneID=3569</a> ] via STAT3 [ <a href="#">GeneID=6774</a> ], e.g., during acute phase response. |
| Full description or abstract |                                                                                                                                         |
| Collection                   | H: hallmark gene sets                                                                                                                   |

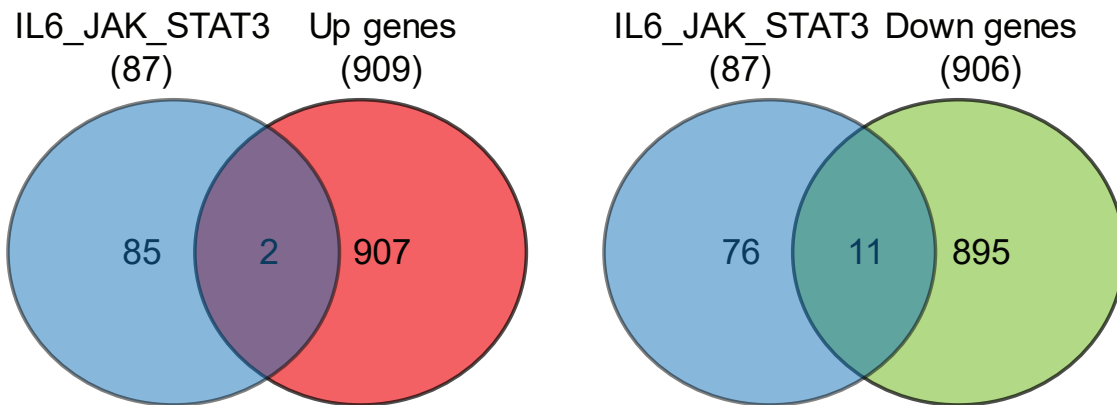

B

|                              |                                                                                                                                                                                         |
|------------------------------|-----------------------------------------------------------------------------------------------------------------------------------------------------------------------------------------|
| Standard name                | STAT3_02                                                                                                                                                                                |
| Systematic name              | M3263                                                                                                                                                                                   |
| Brief description            | Genes having at least one occurrence of the transcription factor binding site V\$STAT3_02 (v7.4 TRANSFAC) in the regions spanning up to 4 kb around their transcription starting sites. |
| Full description or abstract |                                                                                                                                                                                         |
| Collection                   | C3: motif gene sets<br>TFT: transcription factor targets                                                                                                                                |

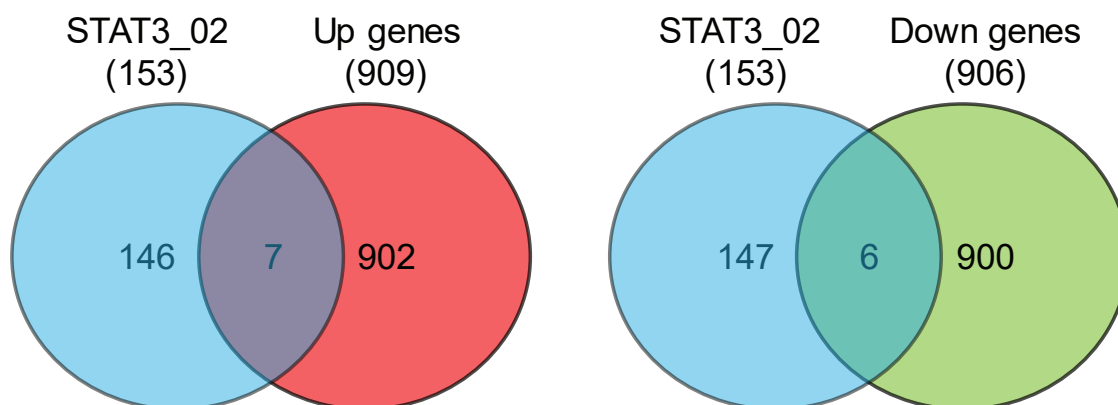

**Supplementary figure S7. JAK/STAT3 pathway in sorafenib-resistant cells.** (A-B) Presence of IL6/JAK/STAT3 regulated genes (A) and STAT3 target genes (B) among up- and down-regulated genes in sorafenib-resistant cells.
