# Supplementary material for: Mitochondrial Plasticity Promotes Resistance to Sorafenib and Vulnerability to STAT3 Inhibition in Human Hepatocellular Carcinoma
Source: MDPI journal article supplement (doi:10.3390/cancers13236029), 2021-11-30
Supplement: s1 [file s1]

Supplementary table S4. Enrichment analysis of drug perturbation gene sets in sorafenib-resistant Huh7 cells

Upregulated genes<sup>1</sup> - Drug perturbations from GEO: Downregulated gene sets

| Index | Name                                                     | p-value   | Adjusted p-value <sup>3</sup> | Z-score | Combined score |
|-------|----------------------------------------------------------|-----------|-------------------------------|---------|----------------|
| 1     | <b>vemurafenib DB08881 human GSE37441 sample 2563</b>    | 7.740e-16 | 6.989e-13                     | -1.63   | 56.65          |
| 2     | <b>vemurafenib DB08881 human GSE37441 sample 2564</b>    | 3.825e-13 | 1.727e-10                     | -1.63   | 46.68          |
| 3     | 4-Hydroxynonenal 5283344 human GSE2397 sample 3078       | 4.872e-11 | 1.466e-8                      | -1.67   | 39.55          |
| 4     | <b>vemurafenib DB08881 human GSE37441 sample 2560</b>    | 1.052e-10 | 1.900e-8                      | -1.63   | 37.40          |
| 5     | Curcumin 969516 human GSE16160 sample 3425               | 7.906e-11 | 1.785e-8                      | -1.59   | 36.97          |
| 6     | doxorubicin, EC50, 1 d 31703 human GSE6930 sample 3260   | 3.519e-8  | 0.000005296                   | -1.70   | 29.13          |
| 7     | RPI-1 1749978 human GSE49414 sample 3173                 | 1.153e-7  | 0.00001487                    | -1.61   | 25.74          |
| 8     | Promyelocytic leukemia DB00755 human GSE5007 sample 2461 | 4.567e-7  | 0.00003758                    | -1.73   | 25.21          |
| 9     | cytarabine, 2xEC50, 1 d 6253 human GSE6930 sample 3422   | 5.179e-7  | 0.00003758                    | -1.71   | 24.72          |

Upregulated genes<sup>1</sup> - Drug perturbations from GEO: Upregulated gene sets

| Index | Name                                                          | p-value     | Adjusted p-value <sup>3</sup> | Z-score | Combined score |
|-------|---------------------------------------------------------------|-------------|-------------------------------|---------|----------------|
| 1     | <b>cetuximab DB00002 human GSE61495 sample 3135</b>           | 1.282e-16   | 1.160e-13                     | -1.73   | 63.14          |
| 2     | <b>cetuximab DB00002 human GSE61495 sample 3136</b>           | 6.597e-11   | 2.985e-8                      | -1.59   | 37.38          |
| 3     | doxycycline DB00254 human GSE2624 sample 3077                 | 2.940e-7    | 0.00008869                    | -1.63   | 24.47          |
| 4     | motexafin gadolinium (12 h) DB05428 human GSE2189 sample 3127 | 0.000001605 | 0.0003632                     | -1.68   | 22.42          |
| 5     | estradiol DB00783 human GSE11352 sample 2729                  | 0.000008530 | 0.001544                      | -1.85   | 21.56          |
| 6     | progesterone 5994 mouse GSE6440 sample 3686                   | 0.00004735  | 0.006122                      | -1.66   | 16.55          |
| 7     | doxycycline DB00254 human GSE2624 sample 3074                 | 0.00004708  | 0.006122                      | -1.57   | 15.69          |
| 8     | chromium 23976 human GSE6907 sample 3534                      | 0.0001109   | 0.01255                       | -1.71   | 15.54          |
| 9     | estradiol 5757 human GSE16683 sample 3394                     | 0.0003842   | 0.03359                       | -1.80   | 14.19          |
| 10    | estradiol 5757 human GSE53394 sample 2652                     | 0.0003319   | 0.03337                       | -1.71   | 13.73          |

Downregulated genes<sup>2</sup> - Drug perturbations from GEO: Downregulated gene sets

| Index | Name                                                | p-value   | Adjusted p-value <sup>3</sup> | Z-score | Combined score |
|-------|-----------------------------------------------------|-----------|-------------------------------|---------|----------------|
| 1     | trovafloxacin DB00685 human GSE9166 sample 3036     | 2.426e-20 | 2.188e-17                     | -1.63   | 73.49          |
| 2     | HYPOCHLOROUS ACID 24341 human GSE11630 sample 3202  | 3.972e-19 | 9.543e-17                     | -1.69   | 71.75          |
| 3     | lung cancer DB00928 human GSE29077 sample 2535      | 1.504e-19 | 6.782e-17                     | -1.64   | 71.24          |
| 4     | lung cancer DB00928 human GSE29077 sample 2536      | 4.232e-19 | 9.543e-17                     | -1.67   | 70.70          |
| 5     | <b>cetuximab DB00002 human GSE61495 sample 3136</b> | 4.230e-18 | 7.630e-16                     | -1.58   | 63.29          |
| 6     | Harman 5281404 human GSE5080 sample 3482            | 2.157e-17 | 3.242e-15                     | -1.61   | 61.72          |
| 7     | VX 39793 human GSE33606 sample 3376                 | 1.151e-15 | 1.483e-13                     | -1.63   | 56.06          |
| 8     | hydrocortisone DB00741 human GSE7890 sample 2751    | 2.463e-15 | 2.777e-13                     | -1.65   | 55.40          |
| 9     | estradiol 5757 human GSE26834 sample 3241           | 5.053e-15 | 4.558e-13                     | -1.64   | 54.03          |
| 10    | lung cancer DB00928 human GSE29077 sample 2534      | 4.533e-15 | 4.543e-13                     | -1.62   | 53.66          |

Downregulated genes<sup>2</sup> - Drug perturbations from GEO: Upregulated gene sets

| Index | Name                                                           | <i>p</i> -value | Adjusted <i>p</i> -value <sup>3</sup> | Z-score | Combined score |
|-------|----------------------------------------------------------------|-----------------|---------------------------------------|---------|----------------|
| 1     | BPDE 41322 human GSE19510 sample 3379                          | 3.240e-24       | 2.933e-21                             | -1.72   | 93.20          |
| 2     | <a href="#">vemurafenib DB08881 human GSE37441 sample 2561</a> | 3.506e-20       | 1.586e-17                             | -1.68   | 75.09          |
| 3     | metoprolol DB00264 human GSE3356 sample 2786                   | 1.963e-16       | 4.441e-14                             | -1.94   | 70.17          |
| 4     | 5-aza-2'-deoxycytidine DB01262 human GSE5230 sample 2497       | 1.280e-16       | 3.861e-14                             | -1.84   | 67.18          |
| 5     | BPDE 41322 human GSE19510 sample 3378                          | 1.200e-14       | 1.358e-12                             | -1.82   | 58.23          |
| 6     | gamma-Tocotrienol 5282349 human GSE21946 sample 3242           | 6.369e-15       | 1.045e-12                             | -1.77   | 57.81          |
| 7     | cytarabine, 2xEC50, 3 d 6253 human GSE6930 sample 3423         | 8.083e-15       | 1.045e-12                             | -1.66   | 53.82          |
| 8     | letrozole 3902 human GSE5462 sample 3097                       | 1.801e-14       | 1.811e-12                             | -1.65   | 52.31          |
| 9     | resveratrol DB02709 human GSE25412 sample 3500                 | 7.843e-15       | 1.045e-12                             | -1.60   | 52.12          |
| 10    | tibolone 444008 human GSE12446 sample 3204                     | 1.184e-12       | 1.010e-10                             | -1.70   | 46.76          |

<sup>1</sup>Genes upregulated in sorafenib-resistant Huh7 cells compared to parental huh7 cells. <sup>2</sup>Genes downregulated in sorafenib-resistant cells compared to parental Huh7 cells. <sup>3</sup>Adjusted *p*-value by the Benjamini–Hochberg method.
