# Supplementary material for: Mitochondrial Plasticity Promotes Resistance to Sorafenib and Vulnerability to STAT3 Inhibition in Human Hepatocellular Carcinoma
Source: MDPI journal article supplement (doi:10.3390/cancers13236029), 2021-11-30
Supplement: s1 [file s1]

**Supplementary table S1.** Gene Ontology cellular component enrichment in sorafenib-resistant Huh7 cells

| Index                                  | Name                         | <i>p</i> -value | Adjusted <i>p</i> -value <sup>3</sup> | Z-score | Combined score |
|----------------------------------------|------------------------------|-----------------|---------------------------------------|---------|----------------|
| <b>Upregulated Genes<sup>1</sup></b>   |                              |                 |                                       |         |                |
| 1                                      | Nucleolus                    | 0.000002684     | 0.0007355                             | -1.57   | 20.16          |
| 2                                      | Preribosome                  | 0.000152        | 0.020768                              | -1.37   | 12.06          |
| 3                                      | Mitochondrion                | 0.0002708       | 0.02473                               | -1.82   | 14.96          |
| <b>Downregulated genes<sup>2</sup></b> |                              |                 |                                       |         |                |
| Index                                  | Name                         | <i>p</i> -value | Adjusted <i>p</i> -value              | Z-score | Combined score |
| 1                                      | Endoplasmic reticulum lumen  | 2.462e-7        | 0.00003213                            | -1.54   | 23.38          |
| 2                                      | Platelet alpha granule       | 5.988e-7        | 0.00005209                            | -1.62   | 23.20          |
| 3                                      | Platelet alpha granule lumen | 0.000009623     | 0.0004186                             | -1.93   | 22.32          |
| 4                                      | Vacuolar lumen               | 0.0001403       | 0.004577                              | -2.13   | 18.89          |
| 5                                      | Focal adhesion               | 1.324e-7        | 0.00003213                            | -1.13   | 17.93          |
| 6                                      | Azurophil granule            | 0.000001974     | 0.0001288                             | -1.35   | 17.80          |

<sup>1</sup>Genes upregulated in sorafenib-resistant Huh7 cells compared to parental huh7 cells. <sup>2</sup>Genes downregulated in sorafenib-resistant cells compared to parental Huh7 cells. <sup>3</sup>Adjusted *p*-value by the Benjamini–Hochberg method.
