# Supplementary material for: Mitochondrial Plasticity Promotes Resistance to Sorafenib and Vulnerability to STAT3 Inhibition in Human Hepatocellular Carcinoma
Source: MDPI journal article supplement (doi:10.3390/cancers13236029), 2021-11-30
Supplement: s1 [file s1]

A

| Gene name | Reg coefficient | Hazard Ratio | Like test | Like test - pvalue |
|-----------|-----------------|--------------|-----------|--------------------|
| MRPL17    | 2.310766        | 10.08214     | 16.89001  | 0.001228           |
| MRPS16    | 2.708782        | 15.01098     | 13.24604  | 0.004234           |
| MRPS15    | 1.340518        | 3.821023     | 10.18299  | 0.014647           |
| MRPL27    | 1.260259        | 3.526336     | 8.896445  | 0.019095           |
| MRPS9     | 1.986407        | 7.289293     | 8.759591  | 0.019095           |
| MRPL18    | 1.750993        | 5.76032      | 8.166346  | 0.019446           |
| MRPL35    | 2.554495        | 12.8648      | 8.013895  | 0.019446           |
| MRPL12    | 0.970765        | 2.639963     | 7.872779  | 0.019446           |
| MRPS12    | 1.062015        | 2.892194     | 7.641021  | 0.019652           |
| MRPL58    | 1.12367         | 3.076121     | 6.879689  | 0.025799           |
| MRPS34    | 1.135695        | 3.113336     | 6.792403  | 0.025799           |
| MRPS7     | 1.16922         | 3.219479     | 6.510251  | 0.027707           |
| MRPL55    | 0.882749        | 2.417537     | 5.734214  | 0.037273           |
| MRPL24    | 0.81763         | 2.265125     | 5.438468  | 0.037273           |
| MRPL48    | 1.533477        | 4.634264     | 5.380914  | 0.037273           |
| MRPS30    | 1.512466        | 4.537907     | 5.318551  | 0.037273           |
| MRPL37    | 1.211836        | 3.359647     | 5.295688  | 0.037273           |
| MRPS21    | 0.882611        | 2.417202     | 5.274312  | 0.037273           |
| MRPS23    | 1.116869        | 3.055272     | 5.019171  | 0.040901           |
| MRPL3     | 1.909337        | 6.748616     | 4.841666  | 0.043059           |
| MRPL54    | 0.977107        | 2.656759     | 4.398719  | 0.052694           |
| MRPL33    | 1.187661        | 3.279402     | 4.332286  | 0.052694           |
| MRPS26    | 1.032373        | 2.807722     | 3.865535  | 0.066431           |
| MRPL10    | 0.775259        | 2.171155     | 3.731865  | 0.068954           |
| MRPL11    | 0.942414        | 2.56617      | 3.195733  | 0.09155            |
| MRPL53    | 0.747651        | 2.112034     | 1.419659  | 0.278356           |
| MRPL44    | 0.958727        | 2.608374     | 1.23849   | 0.305135           |
| MRPL38    | 0.52409         | 1.688921     | 1.16245   | 0.311061           |
| MRPL1     | 0.415171        | 1.51463      | 0.549826  | 0.490002           |
| MRPS35    | 0.576116        | 1.779114     | 0.485237  | 0.502262           |
| MRPL42    | 0.169699        | 1.184949     | 0.041192  | 0.839168           |

B

| Gene name | Reg coefficient | Hazard Ratio | Like test | Like test - pvalue |
|-----------|-----------------|--------------|-----------|--------------------|
| MRPL53    | 0.48597         | 1.625751     | 7.64365   | 0.152261           |
| MRPL3     | 0.541106        | 1.717905     | 5.647432  | 0.152261           |
| MRPL54    | -0.26779        | 0.765066     | 5.469733  | 0.152261           |
| MRPS23    | 0.357904        | 1.430328     | 5.443026  | 0.152261           |
| MRPL17    | 0.297957        | 1.347103     | 4.541616  | 0.205098           |
| MRPL38    | -0.32412        | 0.723162     | 2.592867  | 0.55462            |
| MRPL11    | 0.175745        | 1.192133     | 1.714818  | 0.639887           |
| MRPL10    | 0.224194        | 1.251314     | 1.658535  | 0.639887           |
| MRPS15    | 0.155275        | 1.167979     | 1.538226  | 0.639887           |
| MRPL12    | 0.114776        | 1.121622     | 1.43586   | 0.639887           |
| MRPS16    | 0.200229        | 1.221683     | 1.273495  | 0.639887           |
| MRPL37    | 0.154165        | 1.166683     | 1.235775  | 0.639887           |
| MRPL33    | 0.143985        | 1.154867     | 1.223728  | 0.639887           |
| MRPL48    | 0.184699        | 1.202856     | 1.124363  | 0.639887           |
| MRPS7     | 0.151477        | 1.163552     | 0.963388  | 0.674425           |
| MRPS9     | 0.163774        | 1.177948     | 0.865618  | 0.682332           |
| MRPS30    | 0.162418        | 1.176352     | 0.646724  | 0.768228           |
| MRPS21    | 0.081494        | 1.084907     | 0.523285  | 0.808487           |
| MRPL55    | -0.06273        | 0.939201     | 0.35763   | 0.868801           |
| MRPL1     | 0.087459        | 1.091398     | 0.33881   | 0.868801           |
| MRPL18    | 0.084459        | 1.088128     | 0.269589  | 0.89104            |
| MRPS12    | 0.028727        | 1.029143     | 0.078829  | 0.990223           |
| MRPS26    | 0.029759        | 1.030206     | 0.049786  | 0.990223           |
| MRPL27    | -0.01825        | 0.981914     | 0.027372  | 0.990223           |
| MRPS35    | -0.02859        | 0.971816     | 0.023367  | 0.990223           |
| MRPL35    | -0.0284         | 0.971999     | 0.019469  | 0.990223           |
| MRPL42    | 0.035622        | 1.036264     | 0.018545  | 0.990223           |
| MRPL44    | 0.013521        | 1.013613     | 0.004871  | 0.990223           |
| MRPS34    | -0.00418        | 0.995828     | 0.001324  | 0.990223           |
| MRPL58    | 0.002665        | 1.002668     | 0.000329  | 0.990223           |
| MRPL24    | 0.001269        | 1.00127      | 0.00015   | 0.990223           |

**Supplementary figure S4. Mitochondrial ribosomal proteins and clinical outcome in HCC.** Association of the expression of MRP genes and overall survival in the subset of sorafenib-treated HCC patients (A) and in the total HCC patient population (B) in the TCGA cohort by Cox proportional hazard regression analysis. MRP genes aligned by increasing p-value.
