# Supplementary material for: Mitochondrial Plasticity Promotes Resistance to Sorafenib and Vulnerability to STAT3 Inhibition in Human Hepatocellular Carcinoma
Source: MDPI journal article supplement (doi:10.3390/cancers13236029), 2021-11-30
Supplement: s1 [file s1]

A

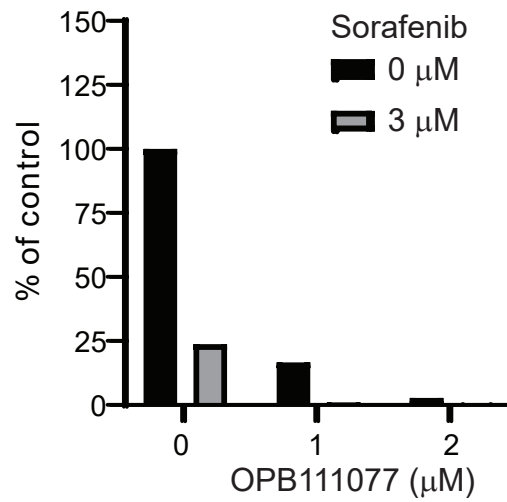

B

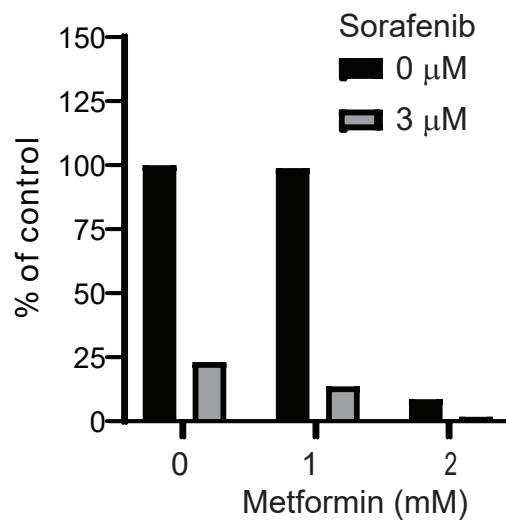

**Supplementary figure S9. Effects of STAT3 inhibition on sorafenib resistance.** (A) Quantification of colony formation by sorafenib-resistant cells treated with sorafenib and OPB-111077 as shown in Figure 5A. (B) Quantification of colony formation by sorafenib-resistant cells treated with sorafenib and metformin as shown in Figure 5F.
