# Supplementary material for: Mitochondrial Plasticity Promotes Resistance to Sorafenib and Vulnerability to STAT3 Inhibition in Human Hepatocellular Carcinoma
Source: MDPI journal article supplement (doi:10.3390/cancers13236029), 2021-11-30
Supplement: s1 [file s1]

A

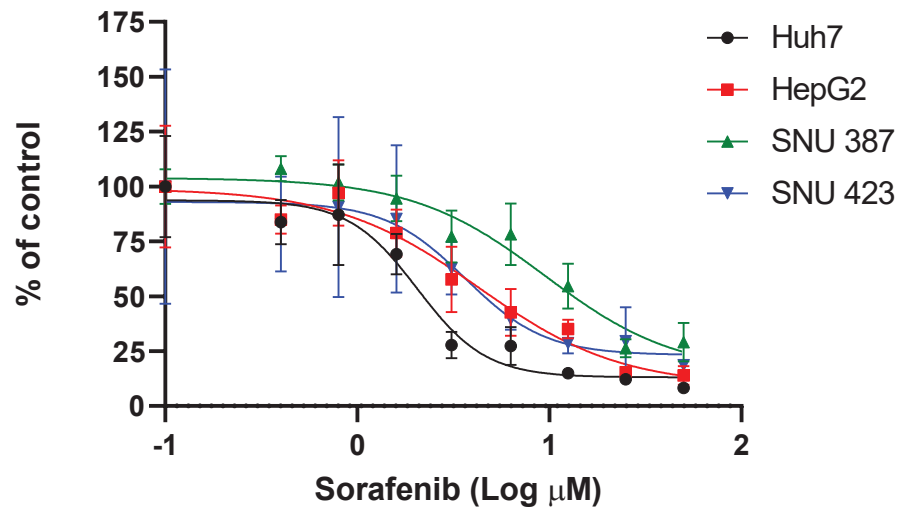

B

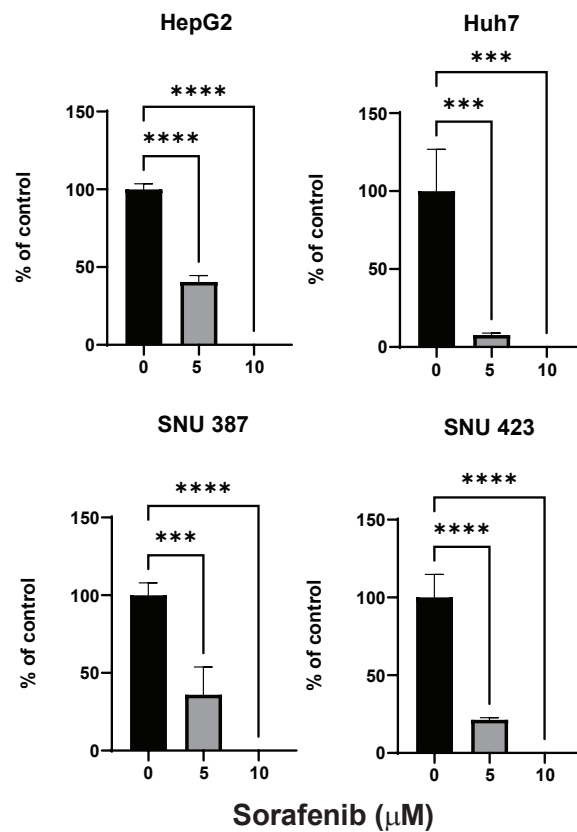

**Supplementary figure S1. Response of human HCC cell lines to sorafenib.** (A) Proliferation of human HCC cell lines incubated with sorafenib. Cell viability was measured after 72 h by the MTT assay. (B) Growth of HepG2, Huh7, SNU-387, and SNU-423 exposed to sorafenib in colony-forming assays.
