# Supplementary material for: Mitochondrial Plasticity Promotes Resistance to Sorafenib and Vulnerability to STAT3 Inhibition in Human Hepatocellular Carcinoma
Source: MDPI journal article supplement (doi:10.3390/cancers13236029), 2021-11-30
Supplement: s1 [file s1]

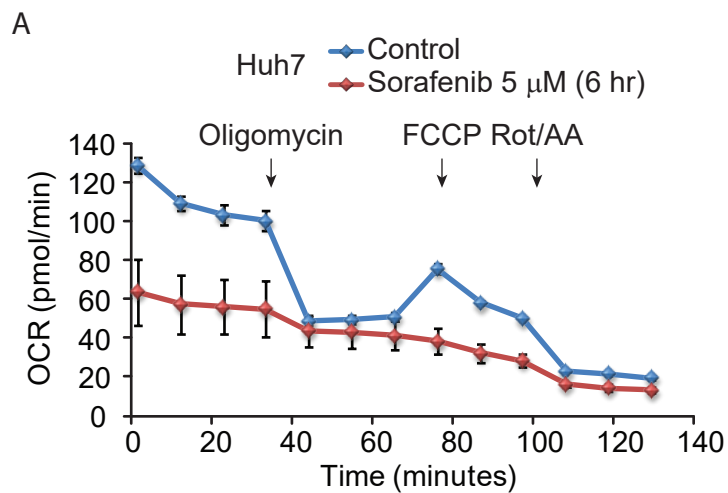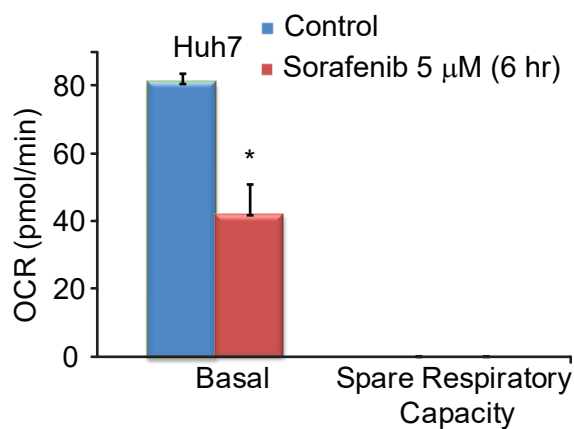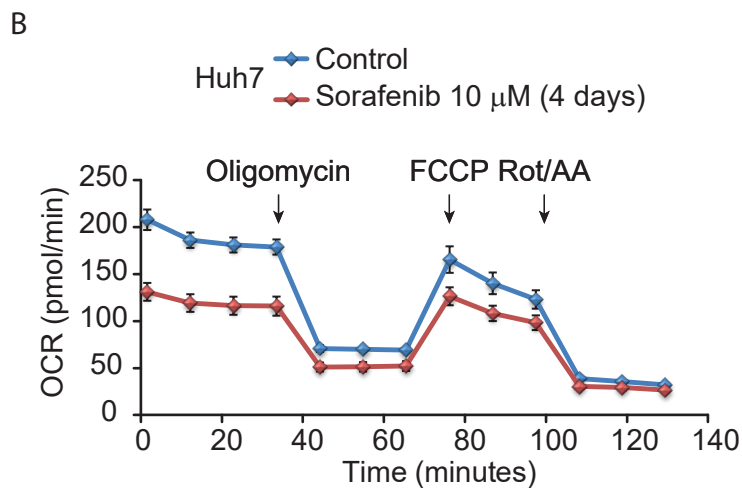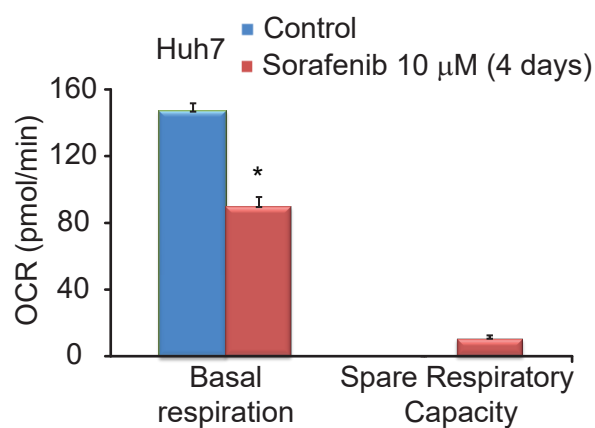

**Supplementary figure S6. Mitochondrial metabolism in sorafenib-treated Huh7 cells.** (A-B) Mitochondrial OCR in parental Huh7 cells treated with sorafenib (5-10  $\mu$ M) for 6 h (A) and 4 days (B). *Top panels*, real-time OCR measurements normalized to cell number. *Bottom panels*, basal and spare respiratory capacity based on OCR profiles.
