# Supplementary material for: Mitochondrial Plasticity Promotes Resistance to Sorafenib and Vulnerability to STAT3 Inhibition in Human Hepatocellular Carcinoma
Source: MDPI journal article supplement (doi:10.3390/cancers13236029), 2021-11-30
Supplement: s1 [file s1]

A

| All patients |         |          |            |              |          |       |
|--------------|---------|----------|------------|--------------|----------|-------|
|              | Stage I | Stage II | Stage IIIA | Stage IIIB-C | Stage IV | Total |
| Cluster 1    | 100     | 39       | 40         | 12           | 2        | 193   |
| Cluster 2    | 51      | 32       | 24         | 3            | 1        | 111   |
| Cluster 3    | 19      | 12       | 2          | 2            | 1        | 36    |
| Total        | 170     | 83       | 66         | 17           | 4        | 340   |

| Sorafenib-treated patients |         |          |            |              |          |       |
|----------------------------|---------|----------|------------|--------------|----------|-------|
|                            | Stage I | Stage II | Stage IIIA | Stage IIIB-C | Stage IV | Total |
| Cluster 1                  | 6       | 4        | 6          | 3            | 1        | 20    |
| Cluster 2                  | 1       | 2        | 1          | 1            | 0        | 5     |
| Cluster 3                  | 1       | 1        | 0          | 0            | 0        | 2     |
| Total                      | 8       | 7        | 7          | 4            | 1        | 27    |

B

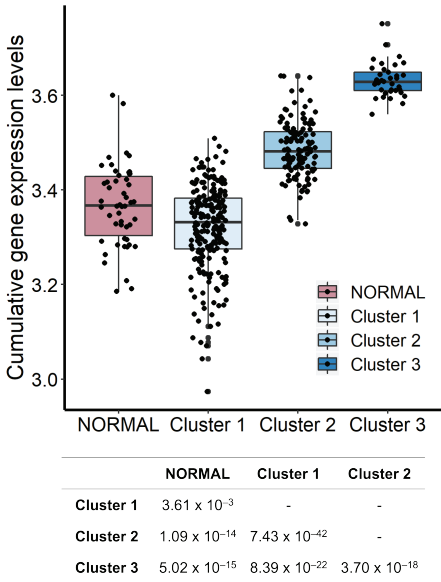

C

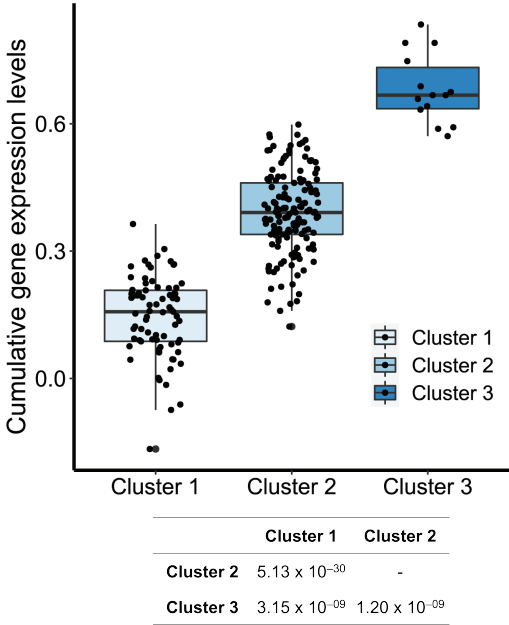

D

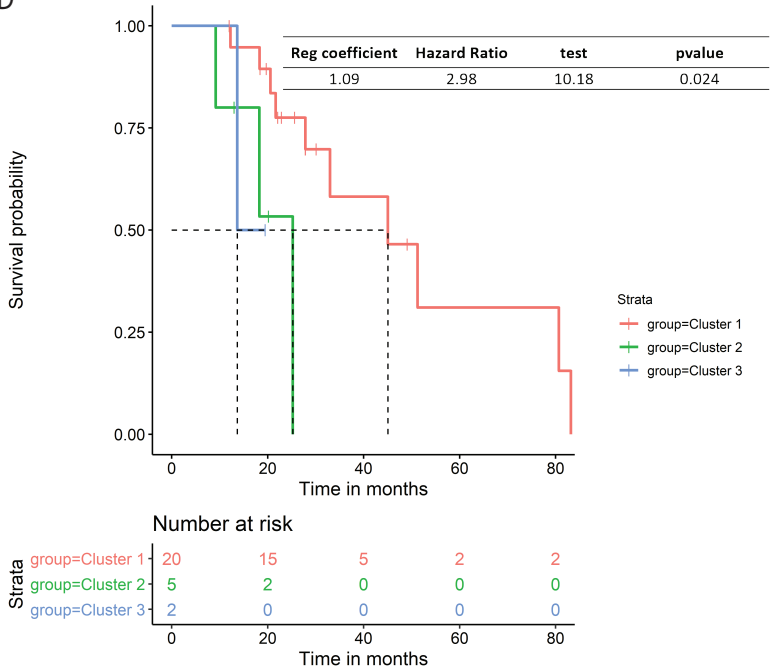

E

| Predictor        | Reg coefficient | Hazard ratio | p-value               |
|------------------|-----------------|--------------|-----------------------|
| Cluster          | -0.27           | 0.76         | 0.265                 |
| Expression value | 1.23            | 3.43         | 0.295                 |
| Stage            | 0.43            | 1.53         | $5.03 \times 10^{-7}$ |

F

| Predictor        | Reg coefficient | Hazard ratio | p-value |
|------------------|-----------------|--------------|---------|
| Cluster          | -0.38           | 0.68         | 0.640   |
| Expression value | 11.35           | 84963.16     | 0.008   |
| Stage            | 0.58            | 1.77         | 0.065   |

**Supplementary figure S3. MRP expression in HCC patients.** (A) Distribution according to stage and MRP-based clustering of patients in the total cohort (Top) and in the subset of patients treated with sorafenib (Bottom) in the TCGA dataset. (B) Differential clustering of HCC and normal liver samples in the TCGA cohort and cumulative MRP gene set expression. Total numbers of normal liver and HCC samples are 50 and 340. Bottom, p-values for all class comparisons. (C) Differential clustering of HCC samples in the ICGC patient cohort and cumulative MRP gene set expression. Total number of HCC samples included in the analysis is 240. Bottom, p-values for all class comparisons. (D) MRP-based clusters and overall survival in sorafenib-treated patients in the TCGA cohort. (E-F) Cox regression multivariate survival analysis considering MRP gene expression, clustering and stage in the entire TCGA cohort (E) and the sorafenib-treated patients (F).
