# Supplementary material for: Mitochondrial Plasticity Promotes Resistance to Sorafenib and Vulnerability to STAT3 Inhibition in Human Hepatocellular Carcinoma
Source: Cancers (Basel). 2021 Nov 30;13(23):6029. doi: 10.3390/cancers13236029 (PMC8657239; doi:10.3390/cancers13236029)
Supplement: Supplementary file 1 [file cancers-13-06029-s001.zip]

Archive with 17 entries (17 files):
- Supplementary dataset S1-Upregulated genes.xlsx
- Supplementary dataset S2-Downregulated genes.xlsx
- Supplementary figure S1-b JM.pdf
- Supplementary figure S2-b.pdf
- Supplementary figure S3-b.pdf
- Supplementary figure S4-b.pdf
- Supplementary figure S5-b.pdf
- Supplementary figure S6-b.pdf
- Supplementary figure S7-b.pdf
- Supplementary figure S8-b.pdf
- Supplementary figure S9-b.pdf
- Supplementary information_Pandit_11_2021.pdf
- Supplementary original image file.pdf
- Supplementary table S1-Cell components.pdf
- Supplementary table S2-Myc-Max target genes.xlsx
- Supplementary table S3-SOX2 targets.xlsx
- Supplementary table S4-Drug perturbations.pdf
