# Supplementary material for: Mitochondrial Plasticity Promotes Resistance to Sorafenib and Vulnerability to STAT3 Inhibition in Human Hepatocellular Carcinoma
Source: Cancers (Basel). 2021 Nov 30;13(23):6029. doi: 10.3390/cancers13236029 (PMC8657239; doi:10.3390/cancers13236029)
Supplement: Supplementary file 1 [file cancers-13-06029-s001.zip › Supplementary dataset S1-Upregulated genes.xlsx]

## Sheet: Sheet1
Supplementary Dataset S1.
Genes upregulated in sorafenib-resistant cells
PROBE_ID	SYMBOL	p-value	Fold Change
ILMN_1789096	OSTalpha	2.27769e-11	5.96008
ILMN_2234697	BEX1	3.65692e-08	3.91177
ILMN_1657234	CCL20	2.03679e-08	3.5327
ILMN_1736078	THBS4	1.21819e-08	3.52766
ILMN_1740170	CHCHD10	0.000294155	2.95832
ILMN_1669972	DKFZ p686O24166	1.40903e-07	2.92148
ILMN_1667578	DUSP26	1.06664e-07	2.79011
ILMN_2181064	GBA3	1.54626e-05	2.72586
ILMN_1692983	SULT2A1	6.8912e-08	2.69889
ILMN_1739222	ETV5	1.38204e-08	2.6537
ILMN_1717381	HOXD1	7.72518e-07	2.58161
ILMN_1795639	MGMT	1.75767e-05	2.55448
ILMN_2396020	DUSP6	5.6327e-05	2.48646
ILMN_1796013	PYCR1	9.41627e-05	2.48426
ILMN_1735445	SLC7A9	9.53082e-09	2.41953
ILMN_1695157	CA4	0.000605298	2.41457
ILMN_3248811	SNORA27	8.44541e-05	2.40132
ILMN_1801703	CPLX1	7.15309e-05	2.34648
ILMN_3230608	NBPF8	0.000110152	2.33436
ILMN_1679299	IGSF1	0.000141479	2.32136
ILMN_1676413	VSNL1	3.17816e-06	2.31849
ILMN_1664350	GBA3	5.30708e-06	2.31837
ILMN_1707169	AGMAT	2.45015e-05	2.31078
ILMN_3238435	SNORA12	0.000182582	2.30831
ILMN_3246206	SNORA79	6.95571e-08	2.30678
ILMN_1656501	DUSP5	1.06429e-05	2.30529
ILMN_2252136	YWHAE	0.020853	2.3048
ILMN_1684447	MDGA2	6.38781e-08	2.30024
ILMN_1710606	C8A	5.0443e-08	2.29227
ILMN_1809623	ACSM2A	4.32562e-08	2.26979
ILMN_2047354	C1orf97	2.83845e-07	2.25554
ILMN_1808769	C1orf97	2.07701e-08	2.25358
ILMN_1668507	DDAH1	3.77309e-07	2.24859
ILMN_1719069	FOXN4	1.1817e-07	2.23855
ILMN_1771652	BAIAP2L2	3.02145e-07	2.22388
ILMN_1760315	VWCE	5.52364e-06	2.18675
ILMN_3247139	C17orf96	3.76645e-08	2.18002
ILMN_1737988	PRNP	1.25859e-05	2.17934
ILMN_3241021	RNY4	0.000695821	2.17607
ILMN_1724407	TACC3	0.000135595	2.14947
ILMN_1747627	ABCA2	0.00269475	2.13636
ILMN_1700031	PRAME	1.90518e-05	2.136
ILMN_1695193	ANGPTL3	2.12753e-06	2.13534
ILMN_2181892	BEX2	1.54016e-07	2.12853
ILMN_1780769	TUBB2C	9.09477e-05	2.11571
ILMN_1804357	GNG4	2.34353e-06	2.11479
ILMN_1716359	SLC19A3	2.49797e-05	2.10795
ILMN_1802808	LOC654103	1.07549e-06	2.10109
ILMN_1892403	SNORD13	0.00415059	2.09027
ILMN_1769158	ISOC2	0.000196267	2.083
ILMN_1766125	LONP1	2.01236e-05	2.082
ILMN_2209515	SNORD56	6.41143e-06	2.07387
ILMN_1749875	LOC728715	5.05132e-06	2.0716
ILMN_1673069	DPP9	0.000150424	2.07114
ILMN_1758943	FAM5C	7.6196e-07	2.06554
ILMN_3235325	SCARNA13	1.90181e-05	2.05933
ILMN_2384544	ADAM15	0.000996513	2.05196
ILMN_1660554	VWA1	8.67324e-05	2.04627
ILMN_1699603	MRPL12	0.000172016	2.04044
ILMN_1722070	APOC3	9.04353e-05	2.03604
ILMN_2151114	VSNL1	0.00012814	2.03347
ILMN_2092589	FAM5C	1.79829e-06	2.01787
ILMN_1766658	PKMYT1	0.00162084	2.01145
ILMN_1767816	APH1B	1.29715e-08	2.0092
ILMN_1694966	ASGR2	0.00508958	2.00758
ILMN_2392546	PAICS	1.33784e-07	2.0033
ILMN_2211003	GAS2L3	0.000164925	2.00279
ILMN_1680774	LOC730994	0.000156024	1.9994
ILMN_1676893	ADCY3	2.90735e-06	1.99905
ILMN_2342638	ASGR2	0.00150101	1.99655
ILMN_1731353	CHPF	0.000916555	1.99493
ILMN_1688335	MAGEB2	6.85418e-08	1.99276
ILMN_3244960	NACC1	0.0129152	1.99244
ILMN_2244547	ETNK1	1.15427e-05	1.99035
ILMN_1728984	PA2G4	0.00427505	1.98735
ILMN_1750052	NOP14	1.25352e-05	1.98524
ILMN_1745807	TMEM62	3.07717e-06	1.98492
ILMN_1651610	LOC730525	0.000145757	1.98245
ILMN_1802799	AKIRIN1	4.54333e-05	1.98194
ILMN_1733863	FAM100A	0.00517312	1.97311
ILMN_3246658	LOC728253	0.0145309	1.96994
ILMN_1673073	WDR62	0.0015991	1.96771
ILMN_1670817	GRPEL1	1.95524e-06	1.96275
ILMN_1712314	DUSP9	2.01098e-06	1.95553
ILMN_1706149	PDCD2L	2.78012e-08	1.9518
ILMN_1781636	VWA1	6.26594e-05	1.95134
ILMN_1802223	ATP2B2	1.10432e-06	1.94923
ILMN_1741406	HOOK1	1.10447e-05	1.9467
ILMN_1699737	TRAP1	0.000254973	1.94275
ILMN_1680091	POP7	7.57015e-05	1.94064
ILMN_1774272	ESRRA	0.000763311	1.93744
ILMN_3236970	LOC339290	8.17486e-05	1.93244
ILMN_1668134	GSTM1	0.000459034	1.92766
ILMN_2268381	RRBP1	0.000341895	1.92759
ILMN_1804277	SPRED1	1.44481e-06	1.92332
ILMN_1753830	ETV4	0.000395806	1.91823
ILMN_1772506	ATP5I	0.0003621	1.91773
ILMN_1663538	CLYBL	2.50872e-05	1.91515
ILMN_1764362	LYAR	0.000138738	1.91463
ILMN_1704055	HSPC111	1.24209e-05	1.91355
ILMN_1688543	APOA2	5.84253e-06	1.91294
ILMN_1774742	MTTP	2.35928e-05	1.90975
ILMN_3240586	PLD6	7.42432e-10	1.90594
ILMN_1703441	ZNF593	9.30919e-06	1.90396
ILMN_1669114	WNK4	1.15812e-05	1.90308
ILMN_1774982	CDC42EP5	1.43488e-05	1.89998
ILMN_1795865	FGFRL1	0.00189507	1.89671
ILMN_1773389	PLTP	0.0157437	1.89569
ILMN_2184109	SLC34A2	5.73966e-06	1.89567
ILMN_2173451	GPI	9.63361e-05	1.89334
ILMN_1691156	MT1A	0.000224256	1.89246
ILMN_1741506	LOC149134	0.000264205	1.89184
ILMN_1743078	LOC643031	0.0470187	1.88938
ILMN_1692545	LOC646849	1.22298e-05	1.88566
ILMN_2086105	SPRY4	6.34107e-06	1.88157
ILMN_2341661	ETV4	0.000240729	1.88134
ILMN_1797786	MAPK12	0.000152846	1.8804
ILMN_2124361	LEAP2	1.14682e-05	1.87835
ILMN_1672720	PRSS12	6.88891e-07	1.87301
ILMN_1763447	PLXNB2	0.0055011	1.87213
ILMN_1659725	EXOSC5	0.00682953	1.87181
ILMN_1808238	RBPMS2	3.30416e-05	1.87081
ILMN_1661337	SRM	0.00038236	1.86919
ILMN_1721022	SHC1	0.000138052	1.8664
ILMN_1773760	PAICS	2.33542e-06	1.86274
ILMN_3247939	SNORA23	0.000144351	1.86227
ILMN_1751328	FAM83H	3.17995e-06	1.86151
ILMN_1805271	ZNF721	6.81664e-05	1.85854
ILMN_2271627	ATXN2L	0.0015004	1.85674
ILMN_2221564	LYAR	2.3257e-05	1.85207
ILMN_1656159	ATP10D	2.49067e-08	1.85144
ILMN_1660965	PRR22	0.00091463	1.84142
ILMN_1677497	STAB2	4.95623e-05	1.84095
ILMN_1776519	RAP1GAP	0.000187162	1.83897
ILMN_3241373	SCARNA18	0.000115703	1.83677
ILMN_1765644	COMMD8	3.18486e-05	1.83655
ILMN_1726603	ATP5I	0.000231903	1.83484
ILMN_3268880	C10orf75	0.000230057	1.82901
ILMN_1711702	CLEC2D	0.00601111	1.82747
ILMN_1782331	TDG	0.000563274	1.82218
ILMN_1691860	SPRY1	7.98705e-05	1.82199
ILMN_2192620	DCAF15	0.0133655	1.82005
ILMN_2357134	SPHK1	2.46094e-05	1.81986
ILMN_3236680	LOC100134393	2.36683e-05	1.81958
ILMN_1667670	SLC25A15	5.45024e-07	1.81588
ILMN_2306033	PRAME	7.13221e-06	1.81541
ILMN_2361163	SSBP3	0.0174149	1.81519
ILMN_1739749	B3GALT6	3.19115e-06	1.81305
ILMN_2371280	CSF3R	7.25492e-05	1.80542
ILMN_1766573	TERC	3.15078e-05	1.80438
ILMN_3210491	LOC389049	0.00340317	1.79945
ILMN_1802109	KBTBD9	9.80344e-06	1.79326
ILMN_2374425	CCNE1	1.23648e-07	1.79174
ILMN_1749114	OTC	1.62745e-07	1.79045
ILMN_2380839	SNRNP70	0.0116887	1.7893
ILMN_3235969	SNORA9	0.0014044	1.78724
ILMN_1804822	SRXN1	0.00071749	1.78585
ILMN_1717052	STARD10	0.0196461	1.7852
ILMN_1770719	KIAA0664	0.00128747	1.78362
ILMN_1708778	ASS1	0.000582528	1.78274
ILMN_3246766	LOC100132247	0.021442	1.78217
ILMN_2189842	SNORA10	0.000423796	1.78201
ILMN_1686951	TM6SF2	1.91032e-05	1.78127
ILMN_2313079	NLRP1	6.75666e-05	1.7786
ILMN_1671478	CKB	0.000992226	1.7785
ILMN_2403458	SMARCB1	0.00688472	1.77676
ILMN_1787628	NOP56	1.33315e-05	1.77673
ILMN_1776936	ANKRD38	0.00361807	1.77597
ILMN_1692464	FLJ20699	0.000167826	1.77211
ILMN_3178406	KLHL29	4.67795e-06	1.77025
ILMN_1703926	PTGER2	1.3545e-06	1.76864
ILMN_1767470	SCPEP1	7.2346e-06	1.76827
ILMN_2383484	C19orf48	6.15639e-05	1.76713
ILMN_1654445	LOC347292	0.0056185	1.76618
ILMN_2243553	ZNF275	1.41683e-05	1.76497
ILMN_2078389	SLC4A2	0.0335842	1.76074
ILMN_1725705	CLPP	0.000186002	1.75764
ILMN_1708151	LAGE3	0.00368528	1.75405
ILMN_3226613	LOC729686	1.0252e-05	1.75166
ILMN_1761138	C9orf142	0.00393199	1.75027
ILMN_1757467	H1F0	0.000473856	1.7495
ILMN_1724406	INO80E	0.0143589	1.74897
ILMN_2074748	HAL	8.94699e-07	1.74841
ILMN_3289346	LOC442075	0.00220908	1.74649
ILMN_1675130	NFIC	0.00327627	1.74606
ILMN_1656718	DEF8	0.000143839	1.74545
ILMN_1730355	FGFR4	0.0306807	1.74521
ILMN_1733390	LARP1B	3.02407e-06	1.7447
ILMN_1741632	RAB3IL1	1.35529e-05	1.74302
ILMN_2224031	CETN3	0.00107631	1.74199
ILMN_2207393	CNOT3	0.0290563	1.74037
ILMN_1751571	RAD23A	0.00158364	1.73928
ILMN_1693340	RAC3	0.00038136	1.73845
ILMN_3265237	FLJ44342	0.000114791	1.73737
ILMN_2219681	RBP2	0.000957215	1.73687
ILMN_1685928	WDR34	9.84153e-05	1.73645
ILMN_1762605	SERPINC1	7.75523e-06	1.7359
ILMN_1798459	PPAN	0.000141357	1.73373
ILMN_1705759	LOC649456	1.6472e-05	1.73267
ILMN_3294222	LOC100132673	0.000597749	1.73204
ILMN_1703092	RECQL4	0.00150989	1.73144
ILMN_1728024	TUBG1	0.0131652	1.7308
ILMN_2121774	JCLN	1.29316e-07	1.73031
ILMN_2395451	ASS1	0.000264128	1.72988
ILMN_1728199	POLE	0.000675076	1.72945
ILMN_2379734	CTBP1	0.000510576	1.72783
ILMN_1729962	DCDC5	1.74375e-06	1.72769
ILMN_1676986	NPIP	0.000118291	1.72621
ILMN_2371700	UCHL5IP	0.000174213	1.72544
ILMN_3206064	LOC646674	0.00644554	1.7253
ILMN_1723123	FGFR3	3.12506e-05	1.72506
ILMN_1726460	RPL14	0.000977318	1.72419
ILMN_2396571	GPR108	0.0265346	1.72289
ILMN_1726030	GPX7	1.47825e-07	1.7218
ILMN_3247159	SCARNA8	5.98032e-07	1.72162
ILMN_1689518	PECAM1	9.69453e-06	1.72134
ILMN_1687235	HPN	0.00202989	1.721
ILMN_2381938	ATP2B2	1.4661e-05	1.72015
ILMN_2055700	SLBP	0.000402729	1.72
ILMN_3247018	SNORA67	0.000804945	1.71998
ILMN_3239531	C4orf48	0.000257111	1.7195
ILMN_1660341	LRPAP1	8.5322e-05	1.71936
ILMN_1769388	GJB2	1.52628e-05	1.7188
ILMN_1739813	HYAL1	6.45975e-06	1.71844
ILMN_2329914	SPRY1	6.41458e-05	1.7177
ILMN_1758146	SIRPA	3.57725e-06	1.71251
ILMN_2198893	LOC407835	0.029076	1.71233
ILMN_1691843	RNPS1	0.0147747	1.71099
ILMN_1707434	LOC653778	0.000318856	1.70954
ILMN_1674302	PPAT	1.35746e-06	1.70892
ILMN_3235326	LOC388796	0.000638449	1.70676
ILMN_1786720	PROM1	0.000758449	1.70626
ILMN_3268914	LOC100128410	6.62096e-05	1.70586
ILMN_1855430	LOC199800	0.00134313	1.7047
ILMN_3235316	SNORA51	0.00127479	1.7045
ILMN_1736575	TRIM28	0.0440768	1.70337
ILMN_1852022	KIAA1881	1.83541e-06	1.7031
ILMN_1727300	ZNF444	0.0149615	1.70079
ILMN_1814282	ISG20L1	0.000185826	1.70063
ILMN_2038775	TUBB2A	2.44799e-06	1.69963
ILMN_1652580	POLD1	0.00125964	1.69944
ILMN_1718646	MMP15	0.00907877	1.6983
ILMN_1657760	SYT17	4.54946e-05	1.69815
ILMN_3243664	LOC440353	0.0139545	1.69787
ILMN_2223010	VBP1	6.37055e-05	1.69733
ILMN_2393144	ARL6IP4	0.000170336	1.69563
ILMN_3248113	SNRNP70	0.00464986	1.69554
ILMN_1793146	CCDC25	0.000188547	1.69528
ILMN_3244640	SNORD96A	0.000343949	1.69513
ILMN_1709604	SNORA64	0.00038606	1.69312
ILMN_1736154	ProSAPiP1	0.00954841	1.69137
ILMN_2168933	TNIP2	0.000204283	1.69112
ILMN_2339028	PKD1	0.000627186	1.68976
ILMN_3208014	LOC100131866	0.00346041	1.6861
ILMN_1696843	LOC613037	0.00662451	1.68576
ILMN_2410713	FGFR4	0.0241184	1.68389
ILMN_2343047	ABCB9	0.000350125	1.68351
ILMN_1745697	MGRN1	0.0112702	1.68188
ILMN_1658486	MRPL54	1.50455e-07	1.68151
ILMN_3211132	LOC645173	0.000265446	1.6813
ILMN_2083588	TTC32	2.15171e-05	1.68046
ILMN_3200362	LOC727908	0.00704636	1.67931
ILMN_1793628	SERPINA10	0.000246915	1.67759
ILMN_3245458	SNORA61	2.19627e-05	1.67729
ILMN_1787844	C19orf10	0.000320349	1.67676
ILMN_2313074	DEDD	0.000297105	1.67572
ILMN_1803312	DIMT1L	7.37546e-05	1.67545
ILMN_1722491	APRT	0.00159137	1.67536
ILMN_2173611	MT1E	0.00339299	1.67503
ILMN_1750100	TUBB4Q	7.46126e-07	1.67499
ILMN_1792910	MNT	0.00150433	1.67497
ILMN_1729115	LOC651816	0.038698	1.67419
ILMN_3239861	C10orf140	1.45727e-05	1.67397
ILMN_1683883	ACY1	0.00211692	1.67253
ILMN_1787691	CITED4	0.0016538	1.67219
ILMN_3304203	LOC729342	8.04584e-05	1.67093
ILMN_1691264	NAT8B	0.00206385	1.67026
ILMN_3246353	SNORD65	0.000312181	1.67012
ILMN_1814151	AGR2	0.000207828	1.67007
ILMN_1651328	LAT1-3TM	0.000145903	1.66864
ILMN_2201580	GSTM2	0.000263078	1.66863
ILMN_1795218	DHX30	0.00396725	1.66638
ILMN_2398995	MRPL24	0.000366777	1.66596
ILMN_2142353	GRTP1	6.3653e-07	1.66561
ILMN_3284119	LOC399804	4.52866e-06	1.66526
ILMN_1695945	MEIS2	3.93054e-06	1.66499
ILMN_1766221	B4GALT1	0.0013258	1.66402
ILMN_1669550	MAD2L2	0.000984614	1.66312
ILMN_1751656	KLF11	9.59514e-06	1.66126
ILMN_2075820	ZNF598	0.00555421	1.66116
ILMN_1723871	OTUB1	0.00133266	1.66065
ILMN_3245517	LOC100134273	0.00591681	1.65611
ILMN_2070072	RPS7	0.0204436	1.65595
ILMN_1786718	NDUFV1	0.0038948	1.65591
ILMN_2367743	TUBG1	0.00105664	1.65531
ILMN_1705849	SPR	0.000795536	1.65512
ILMN_1702197	C9orf140	0.0116612	1.6538
ILMN_1768595	DLG4	0.000114519	1.65371
ILMN_3228294	LOC729279	6.29136e-06	1.65361
ILMN_1787556	NPC1L1	4.8032e-05	1.65325
ILMN_1697665	LOC653972	0.0139543	1.65253
ILMN_1815190	METTL1	0.00012281	1.65174
ILMN_3244157	SNORD83B	0.000937008	1.65135
ILMN_2343264	PRDM16	8.84594e-05	1.65016
ILMN_1692539	SH3BP1	0.00294549	1.64907
ILMN_3298582	LOC728873	0.00114476	1.64879
ILMN_1723235	DUS3L	7.74494e-05	1.64865
ILMN_1660462	MCOLN2	1.88993e-05	1.64825
ILMN_1680703	MRPS15	6.26847e-07	1.64764
ILMN_1748616	GTF2F1	0.00599796	1.64726
ILMN_2348367	FGFRL1	0.000796428	1.64571
ILMN_1770031	ABHD10	5.67136e-08	1.64555
ILMN_1655904	ROR1	3.90181e-05	1.6447
ILMN_1658460	LOC653884	0.00249915	1.64461
ILMN_2408415	RPL9	0.00523219	1.64133
ILMN_2180371	C12orf24	1.94026e-05	1.63964
ILMN_1722742	SCLY	3.41276e-05	1.63924
ILMN_3241554	KANK4	0.000108192	1.63827
ILMN_1669572	RNF126	0.0040621	1.63761
ILMN_3192446	LOC100128410	0.000370163	1.63729
ILMN_1722489	TFF1	6.63714e-05	1.6372
ILMN_1738095	PER2	3.6842e-05	1.63687
ILMN_2337492	RCE1	0.00978889	1.63659
ILMN_2082762	SNORD68	0.0006936	1.63624
ILMN_1810225	KIAA1530	0.000449535	1.63426
ILMN_1731518	PLD6	6.42954e-07	1.63374
ILMN_2115490	NBPF20	0.00829197	1.63369
ILMN_1711005	CDC25A	1.52123e-06	1.63256
ILMN_1787919	PARVB	0.000537381	1.63256
ILMN_2354211	RCC1	8.78691e-05	1.63231
ILMN_3266944	LOC100129599	0.00445452	1.63153
ILMN_2402272	TCEAL8	4.07956e-06	1.63131
ILMN_1715969	SLC25A37	7.67175e-06	1.63051
ILMN_2147105	LOC440348	0.00227842	1.63001
ILMN_1719170	WBSCR27	3.82994e-05	1.6292
ILMN_1653612	KCTD9	0.000230432	1.62786
ILMN_2262462	C19orf29	0.00612132	1.62589
ILMN_3246401	AIF1L	1.77793e-06	1.62552
ILMN_3251592	C9orf140	0.000948397	1.62245
ILMN_2338323	CDC25B	0.00312473	1.62164
ILMN_1654722	MPV17L	5.05196e-06	1.62151
ILMN_1757757	TM6SF2	5.78859e-05	1.62085
ILMN_1685088	RPL36	0.00641151	1.61972
ILMN_1775243	LOC646766	0.00182681	1.61894
ILMN_1715908	NCAPH2	0.00314635	1.6183
ILMN_2393254	CAPNS1	9.2251e-05	1.61799
ILMN_1769013	ASGR1	0.00870219	1.61767
ILMN_1727045	RASGRP3	7.93315e-07	1.6168
ILMN_1719656	MRPL38	0.00315252	1.61659
ILMN_3251691	POLR3G	2.11673e-05	1.61641
ILMN_2053345	KCNT2	0.000859153	1.61591
ILMN_2210482	MRPS34	0.000759408	1.6142
ILMN_1814120	PECR	0.000147545	1.61358
ILMN_1681437	DCXR	5.11695e-05	1.6134
ILMN_1752935	TMEM30B	3.80691e-06	1.61254
ILMN_3239435	HTT	0.000135732	1.61129
ILMN_3251662	HINT3	0.00333293	1.61121
ILMN_1770356	POLRMT	0.00399907	1.6105
ILMN_1790625	CBX3	0.00928444	1.6105
ILMN_2399328	COBRA1	0.00595087	1.61016
ILMN_1763852	ACACB	0.000470279	1.61004
ILMN_3223181	SEC13	6.28922e-05	1.60965
ILMN_1795852	CCNE1	5.8629e-07	1.60933
ILMN_1760089	LOC645018	0.000204216	1.60918
ILMN_1805863	WDR81	0.0228804	1.60896
ILMN_1655765	MRPS21	0.00286996	1.60862
ILMN_1774336	POLE2	2.08003e-05	1.60824
ILMN_1750181	TESC	1.14564e-06	1.60771
ILMN_1772888	LOC645688	0.00389364	1.60764
ILMN_1728626	WDR5	0.00036052	1.60749
ILMN_1684346	TNFAIP8L1	0.000447475	1.60662
ILMN_1673649	HYOU1	0.00443952	1.60555
ILMN_3304049	LOC729500	0.00438149	1.6047
ILMN_1753482	FAM86C	4.18952e-05	1.6041
ILMN_2140990	CAMK1	0.011532	1.60398
ILMN_2155719	NBPF10	0.0153901	1.60369
ILMN_1701636	LOC647786	4.4232e-05	1.60297
ILMN_1657592	ACSM2B	0.000100554	1.60255
ILMN_2140700	CRIPAK	0.000293858	1.60239
ILMN_3247723	NOP16	0.00027709	1.60223
ILMN_1724493	LYSMD2	9.2085e-05	1.60125
ILMN_2195703	PPARGC1B	0.000124324	1.60077
ILMN_3245066	DENND4B	0.00322896	1.59973
ILMN_2208802	NPIP	0.000379954	1.59821
ILMN_3225211	LOC729742	0.00123807	1.59806
ILMN_1659058	PPP1R10	0.000305108	1.59805
ILMN_1666444	RBMS1	8.59697e-05	1.59789
ILMN_1815083	WHSC2	0.000530129	1.59745
ILMN_1798172	IPO4	0.000373658	1.59731
ILMN_1811327	MRPL27	9.50894e-08	1.59681
ILMN_2383306	GPATCH4	1.06141e-06	1.59644
ILMN_1652749	ERF	0.0122245	1.59588
ILMN_2090105	TAGLN2	0.0154602	1.595
ILMN_2161746	TRIP10	0.00495993	1.59497
ILMN_1679042	LOC645937	0.00276431	1.59491
ILMN_1763634	PEX14	0.007101	1.59395
ILMN_1711543	C14orf169	0.000642391	1.59263
ILMN_1657884	NME2	2.64276e-06	1.5925
ILMN_1651776	FHOD1	0.000930124	1.59032
ILMN_1809590	GINS2	0.000933587	1.58983
ILMN_1696339	ZIC2	0.000370386	1.58969
ILMN_1710553	TMEM151A	0.000411183	1.58922
ILMN_1779886	TBC1D14	1.85351e-05	1.5889
ILMN_3304435	LOC728640	0.0013098	1.58848
ILMN_1815480	NAT8	6.39332e-05	1.58807
ILMN_1673673	PBK	1.15577e-05	1.58769
ILMN_1803862	LCN15	0.00194074	1.58759
ILMN_1794659	FUT2	3.9333e-05	1.58752
ILMN_1750722	RPS7	0.0157361	1.58658
ILMN_1670561	TCEAL8	8.98983e-05	1.58551
ILMN_1690295	LOC648343	0.000434515	1.58482
ILMN_1718766	MT1F	0.00047433	1.58357
ILMN_1711748	PLTP	0.00110088	1.58335
ILMN_1796336	MAP1S	0.0244335	1.58332
ILMN_2169025	JOSD2	0.00475002	1.58261
ILMN_1666546	DUSP14	2.19485e-06	1.58221
ILMN_1779353	PUS7	0.000785342	1.58145
ILMN_2156982	IMP4	0.00966805	1.58059
ILMN_1801664	POLR3K	5.03989e-06	1.5803
ILMN_3286809	LOC100131139	0.000472573	1.57987
ILMN_1801697	C19orf46	4.47452e-06	1.57978
ILMN_2059886	TTC38	0.000492774	1.57974
ILMN_1690101	FAIM	6.24331e-06	1.57966
ILMN_1765332	TIMM10	2.72756e-07	1.57929
ILMN_3229033	LOC732360	0.00754434	1.57924
ILMN_1676026	MRPS26	0.00077829	1.57901
ILMN_1774973	SNORD21	2.10407e-07	1.57813
ILMN_2044832	NOP56	0.00372715	1.57786
ILMN_1799103	SNRPB	0.015887	1.57616
ILMN_1815043	MRPS2	0.00087496	1.57607
ILMN_1803810	RRBP1	0.000514511	1.57604
ILMN_1700074	SNORA62	6.04585e-06	1.57522
ILMN_1708743	NT5DC2	0.0202589	1.57488
ILMN_1665066	C4orf14	1.26165e-06	1.57404
ILMN_2212763	ICAM3	3.58471e-05	1.57364
ILMN_2146566	SFRS16	0.00232886	1.5732
ILMN_2173004	RAB8B	0.00447627	1.57243
ILMN_2411963	RBM39	6.00596e-05	1.57156
ILMN_3248218	SNORD104	0.00626761	1.57085
ILMN_1768311	LOC728888	0.00212308	1.5707
ILMN_1764596	MPST	0.029147	1.57066
ILMN_1678052	C19orf24	0.0113559	1.56984
ILMN_1792138	UQCRH	0.0190488	1.56953
ILMN_1707493	SNHG3-RCC1	0.00028337	1.56952
ILMN_1734742	ARHGDIA	0.0131744	1.56809
ILMN_1655311	LOC145853	0.00252292	1.56806
ILMN_2344971	FOXM1	1.99277e-05	1.56771
ILMN_3292056	LOC727984	0.00126503	1.56761
ILMN_3308335	RNU6-1	0.000438126	1.56728
ILMN_1671911	MTA1	0.00238523	1.56716
ILMN_1772370	ARHGEF1	0.0223793	1.56665
ILMN_1657446	C1orf57	6.47016e-05	1.56585
ILMN_3239629	LOC729679	0.00181847	1.5655
ILMN_1786852	ZCCHC3	0.000166688	1.56546
ILMN_2376625	VHL	0.00151446	1.56542
ILMN_1690826	TNKS1BP1	0.00484769	1.56532
ILMN_1777139	MAK16	0.00227424	1.5649
ILMN_2389582	HNRNPL	2.73725e-05	1.5646
ILMN_1746492	RABL4	2.03464e-05	1.56438
ILMN_3254984	LOC100129759	3.8222e-06	1.56405
ILMN_1794595	GAMT	0.014755	1.56364
ILMN_3248505	EMID2	0.000130761	1.56357
ILMN_1664168	SLC25A11	8.41796e-06	1.56289
ILMN_3250398	CNGB1	7.76625e-05	1.56121
ILMN_1782305	NR4A2	0.0013424	1.56029
ILMN_1745271	EXOSC4	0.000147302	1.55923
ILMN_1743396	ACOX3	9.15004e-05	1.5591
ILMN_1782633	BOLA2	0.000315676	1.55675
ILMN_1689665	NAE1	0.000325144	1.55516
ILMN_2057409	LOC388503	5.15752e-05	1.55498
ILMN_2182198	ICT1	1.94435e-06	1.55388
ILMN_1734153	GDI1	0.00489003	1.55363
ILMN_1724832	OVOL2	0.000778327	1.55298
ILMN_1809139	AHCTF1	0.000766961	1.55296
ILMN_1724437	GCAT	0.00860735	1.55265
ILMN_1775939	SF3B2	0.00213478	1.55207
ILMN_1716441	SNORD4A	0.00409878	1.55187
ILMN_2149782	RAMP2	0.00089224	1.55103
ILMN_3225406	LOC728640	0.000180105	1.54992
ILMN_1653292	PFKFB4	0.00205015	1.54905
ILMN_1703648	TMEM82	0.00323749	1.54873
ILMN_1797181	LOC93622	1.23556e-05	1.54836
ILMN_1715583	BOP1	0.000216234	1.54822
ILMN_1745686	MFHAS1	0.000476317	1.54739
ILMN_1663113	TTLL12	0.000147465	1.54649
ILMN_2373632	IDH3B	0.0181491	1.54648
ILMN_1745849	ENTPD5	0.00770294	1.54602
ILMN_1746128	ACSM2B	0.00013557	1.54599
ILMN_1671442	WDR43	3.49316e-05	1.54434
ILMN_1655922	SAPS2	0.000645844	1.54391
ILMN_1695576	MRPL24	0.0052508	1.54384
ILMN_3243419	LOC100130715	0.0194778	1.54301
ILMN_1736077	LIAS	7.82682e-06	1.54283
ILMN_1704873	TCEB1	0.00610719	1.54249
ILMN_1796074	C18orf56	0.000876158	1.54207
ILMN_2346769	FAM189B	0.000533435	1.54179
ILMN_1765684	C19orf70	0.0205587	1.54165
ILMN_3249142	JCLN	1.08746e-05	1.54161
ILMN_1659343	BOLA2	4.44434e-06	1.54157
ILMN_1751789	HNMT	0.00134732	1.54114
ILMN_1813796	TMEM169	7.47062e-05	1.54024
ILMN_3294335	LOC646294	0.00015449	1.54022
ILMN_1694799	PIAS2	1.0619e-06	1.54019
ILMN_1742432	COBRA1	0.00423572	1.53995
ILMN_3293049	LOC284167	0.00113506	1.53968
ILMN_1775170	MT1X	0.00257375	1.53937
ILMN_1748407	CCS	0.0023339	1.53922
ILMN_1655418	CAPNS1	0.00434576	1.53749
ILMN_1743217	SNORD32A	0.00638735	1.53692
ILMN_1811117	LOC400986	0.000731231	1.53683
ILMN_1688089	PEBP1	0.000828405	1.53619
ILMN_1653469	RPL12	0.000135421	1.53612
ILMN_1695422	NCL	0.0171015	1.53609
ILMN_1814657	TFAP4	0.000718489	1.53602
ILMN_1733603	NDUFC1	0.00200768	1.53582
ILMN_1720833	C2orf48	0.000107442	1.53545
ILMN_1671791	PCK2	0.00811489	1.53508
ILMN_1671742	UPF3A	3.31483e-05	1.53425
ILMN_1789436	C1orf218	0.000277306	1.53389
ILMN_1691090	MPV17	0.00927722	1.5338
ILMN_1785405	SLC17A9	0.00296157	1.53338
ILMN_1760649	PCK2	0.0012964	1.5328
ILMN_1788742	LOC441246	0.00110703	1.53266
ILMN_3305304	POLD2	0.000385725	1.53124
ILMN_1701487	TAOK2	0.0042397	1.53067
ILMN_3241139	SNORD57	0.00134715	1.5285
ILMN_1810559	RHOQ	5.1153e-05	1.52843
ILMN_1667239	INPP1	0.000655316	1.52807
ILMN_1673933	LOC440341	0.000575218	1.5276
ILMN_1676458	MRPL11	4.84973e-06	1.52687
ILMN_2400644	SRGAP3	0.00286305	1.52685
ILMN_3275936	LOC100133277	0.000812247	1.52625
ILMN_1730260	N6AMT2	0.00180064	1.52498
ILMN_2345016	PTGES2	0.0477383	1.52452
ILMN_1723092	CRB3	0.00661668	1.52421
ILMN_1778991	NFIB	0.00114881	1.5237
ILMN_2275248	ECE2	0.000959328	1.52328
ILMN_1676192	SLC13A5	0.0012596	1.52328
ILMN_1710668	LETM1	0.000670577	1.52302
ILMN_1781795	ERH	0.00297873	1.5229
ILMN_1726410	APRT	0.0093039	1.52275
ILMN_1739283	UPF2	0.0177696	1.52259
ILMN_1746465	FJX1	2.01671e-05	1.52212
ILMN_1811682	CYLN2	0.0149927	1.52174
ILMN_3307926	ADRBK1	0.00197637	1.52138
ILMN_1653342	DUS1L	0.0112172	1.52123
ILMN_3235404	SNORA57	0.00792615	1.52117
ILMN_1741054	SLC5A6	0.00120974	1.52031
ILMN_2328433	NOP2	0.00119617	1.51985
ILMN_3237991	LOC645166	6.53745e-07	1.51828
ILMN_2189933	RPL36AL	3.31908e-06	1.51819
ILMN_2228710	PDCD5	7.06376e-05	1.51753
ILMN_3300471	LOC730255	0.00313446	1.51745
ILMN_2065606	TOMM40L	0.000268146	1.51739
ILMN_2382290	KREMEN2	0.000588312	1.51696
ILMN_1756402	TMEM177	0.00092167	1.51689
ILMN_1673936	KHSRP	0.00166834	1.51666
ILMN_1740737	DCPS	0.000960593	1.51663
ILMN_1672486	TCF7L2	0.0104418	1.51659
ILMN_2405991	TRAF7	0.0027	1.51626
ILMN_1791576	CHSY1	0.000260298	1.51605
ILMN_1742163	LOC441087	0.0271969	1.51578
ILMN_2130635	FOXRED2	0.00669322	1.51563
ILMN_1704672	OBFC2B	0.00143655	1.51498
ILMN_1671257	DKC1	5.08485e-05	1.51458
ILMN_1693317	TTC15	0.00123051	1.51431
ILMN_1764165	TRIM65	1.14235e-05	1.51423
ILMN_1690733	EGF	0.000303071	1.51409
ILMN_1808712	RNF40	0.00152429	1.51409
ILMN_1801476	CDS1	2.56238e-05	1.51388
ILMN_2177965	RPS19BP1	0.00269191	1.51351
ILMN_2386818	URG4	0.000805587	1.51345
ILMN_1787280	C1orf135	0.0035218	1.51276
ILMN_3306997	METTL1	0.00022512	1.51271
ILMN_1713605	RPAP1	0.000513798	1.51182
ILMN_3305942	LOC729970	0.000284691	1.5117
ILMN_1767324	EIF4EBP1	8.77602e-05	1.51154
ILMN_3249291	F2	0.00627614	1.51134
ILMN_2087303	XKR8	0.0010525	1.51091
ILMN_2389528	MTL5	0.000280764	1.51088
ILMN_1697736	EXOSC2	1.91675e-05	1.51054
ILMN_2347748	FLJ12949	0.00331669	1.50947
ILMN_1688480	CCND1	0.000704323	1.50882
ILMN_2327346	SSBP4	0.00407954	1.50867
ILMN_1707464	MST1	0.00157624	1.50853
ILMN_1806607	SFN	0.00670952	1.50762
ILMN_2148796	MND1	0.000158683	1.50756
ILMN_1808591	LOC731049	0.0172403	1.50609
ILMN_1728684	PELP1	0.0218343	1.50596
ILMN_2391861	GSTM1	0.000611852	1.50595
ILMN_1789240	MLST8	0.0248378	1.50534
ILMN_1800602	GCA	0.000724094	1.50519
ILMN_3238785	SNHG9	0.00380274	1.50439
ILMN_1813938	CHCHD4	0.00132386	1.50389
ILMN_1660871	NEK6	4.61894e-05	1.50382
ILMN_1770084	TACC1	7.81624e-06	1.50371
ILMN_2405233	FAM133B	0.00447347	1.50213
ILMN_1671494	USP5	0.0297343	1.50202
ILMN_1669310	RHOT2	0.00764313	1.50186
ILMN_1725271	GPR3	4.17448e-07	1.50064
ILMN_1718303	PVRL2	0.0139269	1.49969
ILMN_1765558	NPAS2	8.21068e-05	1.49949
ILMN_1657873	XPO4	6.84286e-05	1.49896
ILMN_1758055	YIF1B	0.00396063	1.49866
ILMN_2400512	PRKCSH	0.0461952	1.49847
ILMN_1655046	NUTF2	0.00145884	1.49823
ILMN_1735360	SDAD1	0.00256693	1.4978
ILMN_1660942	LOC653352	0.000193579	1.49726
ILMN_2160160	SNORD36C	0.000785211	1.4966
ILMN_2325978	HDGF2	0.00319871	1.4965
ILMN_1773849	ATP6V0C	0.0482539	1.49639
ILMN_1774733	SOCS1	0.00191332	1.49623
ILMN_3253990	LOC100130233	0.000117973	1.49621
ILMN_1714515	MRPS12	0.000439306	1.49616
ILMN_1741736	DDX28	5.19925e-07	1.49492
ILMN_3236130	LOC100132547	0.0110434	1.49482
ILMN_1783728	TBRG4	0.000101423	1.49388
ILMN_2391976	SLC45A4	0.000116509	1.49372
ILMN_3240321	AEN	0.00330847	1.49278
ILMN_3283664	LOC100132037	0.00083248	1.4927
ILMN_1697916	GYLTL1B	0.000458683	1.49268
ILMN_1697377	LOC649841	0.00139113	1.49256
ILMN_1731070	ORC6L	0.000941453	1.49255
ILMN_1695271	RPP25	0.0442446	1.4916
ILMN_1766558	LOC647336	0.000848529	1.49034
ILMN_1705407	NOP56	0.000645809	1.49005
ILMN_1707791	TAZ	0.00116648	1.48983
ILMN_1764690	NTS	5.72086e-05	1.48972
ILMN_1703906	HJURP	0.000116538	1.48897
ILMN_1795822	DIS3L	0.0108231	1.48836
ILMN_1750974	S100A9	6.5976e-06	1.48755
ILMN_1668639	TBC1D10B	0.00301317	1.48737
ILMN_1720542	POLR2I	2.68933e-05	1.48714
ILMN_1729294	RNF130	3.34686e-08	1.48706
ILMN_1752046	SH2B3	0.000511345	1.48701
ILMN_1801553	LEO1	4.73718e-05	1.48698
ILMN_1741957	RABEPK	0.000397096	1.48674
ILMN_1652486	THAP7	0.00112763	1.48622
ILMN_1800221	LOC643624	0.000672339	1.48548
ILMN_1714327	SETD1A	0.0190525	1.48515
ILMN_1727996	BAG4	0.0020929	1.48506
ILMN_1717909	TMEM16A	2.74798e-07	1.48505
ILMN_1749396	LSR	0.014886	1.48498
ILMN_3235477	RRP1	8.23087e-06	1.48486
ILMN_2381168	CTNNBIP1	1.69637e-07	1.48424
ILMN_2328986	SREBF1	0.0192915	1.484
ILMN_1713006	CDC34	0.0383598	1.48369
ILMN_1733930	PREB	0.00269543	1.48336
ILMN_1762426	DHFRL1	0.000448767	1.48322
ILMN_2091310	TMEM16A	8.72557e-05	1.48291
ILMN_1716907	FLJ20254	0.00587141	1.4829
ILMN_1743316	FAM109A	0.000322732	1.48269
ILMN_1814589	LOC728037	0.00127732	1.48253
ILMN_3192316	LOC100129237	0.000130814	1.48239
ILMN_1683026	PSMB10	0.0103059	1.48235
ILMN_1770206	GEMIN4	0.000685756	1.48206
ILMN_1690252	ALKBH2	0.000154511	1.48204
ILMN_1659405	LOC653773	0.0352327	1.48132
ILMN_3287068	LOC728031	0.00218912	1.48109
ILMN_1707748	PIM3	0.0102666	1.48099
ILMN_2179652	PRELID1	5.74135e-05	1.48096
ILMN_1677800	SGTA	0.00797597	1.48085
ILMN_1763739	SOLH	0.00104047	1.48058
ILMN_1776325	UBE2Q1	0.00152585	1.48058
ILMN_1654318	PTPN23	0.00386551	1.48055
ILMN_2316778	ETNK1	0.000476562	1.48031
ILMN_1788439	LOC441193	0.000284496	1.48008
ILMN_2354649	SFRS13A	0.00166702	1.479
ILMN_1688953	ARHGAP19	0.00232332	1.47873
ILMN_3206132	LOC388076	0.0393555	1.47779
ILMN_3219340	LOC100131713	0.000300035	1.47759
ILMN_2410783	GAA	0.00824437	1.47736
ILMN_1772957	FOXRED2	0.00484209	1.47712
ILMN_1800855	PPTC7	3.43398e-06	1.47664
ILMN_1688228	LOC145837	0.00182938	1.47652
ILMN_1806106	GNL3	1.43926e-09	1.47641
ILMN_2112811	RPL36A	0.0305176	1.47639
ILMN_1666594	IRF8	0.000329949	1.47607
ILMN_1671969	UGP2	0.0451006	1.47597
ILMN_1743219	CA11	4.86659e-07	1.47568
ILMN_1653761	MYCN	8.27796e-06	1.4755
ILMN_1788315	SIN3B	0.0043412	1.47529
ILMN_1708414	GNL3L	0.00105001	1.47523
ILMN_3222402	LOC730284	0.000232441	1.47508
ILMN_1810680	BOLA2	0.0363106	1.47507
ILMN_1701195	PLA2G7	1.26178e-05	1.47477
ILMN_3235221	LOC644936	0.0174712	1.47476
ILMN_3254492	LOC100129650	5.51088e-05	1.47429
ILMN_1703123	AXUD1	0.000283371	1.47419
ILMN_1712088	CLYBL	0.00022408	1.47364
ILMN_2089329	SPRY2	0.000273527	1.4727
ILMN_1791820	ZNF768	9.7062e-06	1.47263
ILMN_1672382	SLC38A3	3.1911e-06	1.47236
ILMN_1763104	TRAF4	0.000727136	1.47204
ILMN_3281563	LOC648771	7.62781e-05	1.47174
ILMN_1713990	TRIP6	0.00651735	1.47162
ILMN_2095820	UTP14A	0.000570221	1.47126
ILMN_1775111	SND1	0.0169898	1.4711
ILMN_1756705	CHTF18	0.00186118	1.47078
ILMN_1756542	TBC1D17	0.0192006	1.47024
ILMN_3188174	LOC100129067	4.69355e-05	1.46956
ILMN_2157544	GBF1	0.00604863	1.46843
ILMN_1787648	GPR125	0.00020022	1.46819
ILMN_1758798	LOC728734	0.00130897	1.46793
ILMN_3201986	LOC100132795	0.00833602	1.46735
ILMN_3305508	LOC728779	0.00255784	1.46706
ILMN_2323508	C9orf58	8.02354e-05	1.46664
ILMN_1808674	CPN1	0.000290706	1.46629
ILMN_1778255	FARSA	0.0115334	1.46625
ILMN_1696190	STRN4	0.0289423	1.4662
ILMN_2363106	RBM23	0.000335215	1.46597
ILMN_1674661	CIRBP	0.00059062	1.46556
ILMN_1697820	HINT2	0.000975986	1.46501
ILMN_1667857	C12orf52	0.002675	1.46499
ILMN_1771697	VRK3	0.000106877	1.46481
ILMN_3291472	LOC442727	0.00676701	1.46472
ILMN_1683811	TNPO3	0.00033273	1.4646
ILMN_1680134	CARM1	0.00107667	1.46401
ILMN_2076658	MRPL1	0.000690134	1.4633
ILMN_3297644	TMEM214	0.0156008	1.46307
ILMN_1733519	HMGB3	1.52064e-05	1.46275
ILMN_3280019	LOC100132795	4.89794e-05	1.46258
ILMN_1783963	AGXT2	4.46603e-05	1.46257
ILMN_3236904	LOC648740	2.24313e-05	1.46248
ILMN_2330243	NUDT1	0.0057791	1.46245
ILMN_2402341	MAPK3	0.00757477	1.46233
ILMN_1701681	SEC11C	2.30855e-05	1.46216
ILMN_3246465	SNORA16A	2.3614e-05	1.46213
ILMN_1762255	GSTM1	4.54435e-05	1.46155
ILMN_1756920	ADAM15	0.0116356	1.4613
ILMN_1781256	LEFTY2	6.4264e-05	1.46037
ILMN_1764628	LYPLA2	0.00612306	1.46003
ILMN_1784467	NUP210	0.00549515	1.46002
ILMN_1815326	CCDC68	8.76143e-05	1.45948
ILMN_1663975	CNNM2	1.48786e-05	1.4589
ILMN_2320964	ADAR	4.28924e-05	1.45855
ILMN_2405680	CRB3	0.00108322	1.45821
ILMN_1761764	ALKBH7	0.0379608	1.45784
ILMN_1704973	SARDH	2.1499e-06	1.45751
ILMN_2405129	ARHGEF1	0.0104969	1.45744
ILMN_3225784	LOC730029	0.00100688	1.4566
ILMN_1704446	SLC6A10P	8.42606e-07	1.45649
ILMN_1790455	BCAM	0.0242797	1.45626
ILMN_3238623	LYRM7	0.00547747	1.4561
ILMN_1800634	NME4	0.0129841	1.45575
ILMN_1789839	GTF3C1	0.0174296	1.4546
ILMN_2379130	IRAK1	0.000250392	1.45447
ILMN_1789510	STIP1	0.01481	1.45445
ILMN_1707901	DHRS7B	1.74264e-05	1.45401
ILMN_2372040	MTP18	0.00089243	1.45369
ILMN_1772207	LOC653377	0.00912422	1.45368
ILMN_3240389	CPOX	0.00729239	1.45367
ILMN_1767459	POLR3B	0.0093771	1.45358
ILMN_1792672	POLR2D	0.000916795	1.45354
ILMN_1746252	LOC391811	0.00659496	1.45349
ILMN_1758717	SUPT6H	0.00694587	1.4529
ILMN_2393341	LIAS	0.0017796	1.45286
ILMN_1677697	LOC441377	0.0314571	1.45207
ILMN_1664855	PPP1R14C	0.000565592	1.45194
ILMN_1797530	CHCHD5	0.00137412	1.45182
ILMN_1766010	YARS	5.62933e-05	1.45137
ILMN_1814464	RAMP2	0.00206524	1.45105
ILMN_2411559	PUS1	0.00870098	1.45099
ILMN_1811972	MYCBP2	0.000348616	1.45067
ILMN_1761912	MGAT1	0.00214729	1.45065
ILMN_1744308	DHX33	9.65583e-05	1.4504
ILMN_1656369	C8orf4	3.7705e-05	1.44987
ILMN_2219131	RPS15	0.0046097	1.44928
ILMN_1688178	RRP7A	4.09747e-05	1.4491
ILMN_1740169	TYRO3	0.00184235	1.44897
ILMN_1784655	TLCD1	0.000347555	1.44795
ILMN_1697777	TSTA3	0.022878	1.44765
ILMN_1772124	ATRN	0.00144625	1.44705
ILMN_2401436	PKMYT1	0.00167474	1.44694
ILMN_3299478	LOC728428	0.0344402	1.4465
ILMN_1683447	LOC440737	0.0403518	1.44642
ILMN_1695731	TUBG1	0.0276785	1.44637
ILMN_1709294	CDCA8	0.000998045	1.44636
ILMN_1667016	FAF1	0.000457148	1.44635
ILMN_2336130	SULT1A4	0.000951385	1.44633
ILMN_3298215	LOC729340	0.0014833	1.44625
ILMN_1796430	PSMD3	0.00255284	1.44589
ILMN_1781231	SLC25A38	0.000624443	1.44564
ILMN_1715625	C20orf94	0.000790909	1.4454
ILMN_1807277	IFI30	0.0347818	1.44471
ILMN_1659610	TJP3	0.0397092	1.44436
ILMN_1815169	MCM5	0.00217404	1.44409
ILMN_3235013	LOC730288	0.00248574	1.44395
ILMN_2358760	HPN	0.00308469	1.44395
ILMN_1742889	WDR77	3.29392e-05	1.44375
ILMN_1735156	SLC4A11	0.00298775	1.4436
ILMN_1765326	DGKD	0.000465597	1.44357
ILMN_2348090	MRPL55	0.00101165	1.44356
ILMN_1651788	MAP3K11	0.0135126	1.44242
ILMN_1705447	AFG3L1	0.00220653	1.44171
ILMN_2193315	C14orf143	0.000207618	1.44144
ILMN_1690386	CSRP2BP	1.94004e-05	1.44111
ILMN_1779882	ANKRD43	0.000279884	1.44093
ILMN_1707342	LRIG1	0.00099817	1.44067
ILMN_1706553	SMG7	0.0450263	1.44036
ILMN_1740441	CYB5R3	0.0346948	1.44016
ILMN_1719158	CTBP1	0.0132955	1.43971
ILMN_1746948	MYL5	0.00179509	1.4392
ILMN_3241212	LOC732419	0.000458733	1.43886
ILMN_1814194	TCF4	0.000144443	1.43885
ILMN_1810199	ASRGL1	5.66238e-05	1.43872
ILMN_2192032	SRP19	0.000441511	1.43871
ILMN_2358457	ATF4	0.00567169	1.43866
ILMN_1691570	METTL5	0.000109069	1.43848
ILMN_2209180	P15RS	0.00302078	1.4384
ILMN_1715616	PPIL5	0.000244011	1.43815
ILMN_1809384	CYP4F12	0.000105096	1.43805
ILMN_1712231	SH3YL1	0.000423776	1.43783
ILMN_2326282	C19orf6	0.0336849	1.43772
ILMN_3242288	LOC641768	0.0437483	1.43771
ILMN_1712914	SEMA6B	2.55004e-05	1.43745
ILMN_2398926	C17orf58	0.000140118	1.43685
ILMN_2385220	DFFA	0.00441873	1.43676
ILMN_1763688	C17orf49	0.0204837	1.43671
ILMN_3310351	RNU6-15	0.000416091	1.4365
ILMN_1715416	NUP188	0.000120191	1.43649
ILMN_1688103	CTNNBIP1	0.00277793	1.4364
ILMN_1725166	POLN	0.000131247	1.43488
ILMN_1741398	KIAA0406	0.000174239	1.43472
ILMN_3239574	SNORD3A	0.0157331	1.43472
ILMN_1695334	PYGO2	0.0228748	1.4347
ILMN_3249286	SNORD12C	0.000158477	1.4339
ILMN_1743021	CAMKK2	0.000586454	1.43366
ILMN_1665601	LOC728944	0.00390819	1.43344
ILMN_1665832	ID1	0.00128195	1.43322
ILMN_1773964	H1FX	0.0166188	1.43321
ILMN_1710979	ANKRD39	0.00104076	1.43287
ILMN_1664449	ALG5	0.0162666	1.43186
ILMN_1706266	RNF157	0.0387089	1.43153
ILMN_1805999	MYO1D	0.000152063	1.43032
ILMN_3225591	RPL14L	0.00181293	1.43025
ILMN_2336133	SULT1A4	0.00456407	1.43025
ILMN_1806710	ESPN	0.00558706	1.43002
ILMN_1780153	QTRT1	0.000795287	1.42942
ILMN_1762103	WDR48	0.000191402	1.42881
ILMN_1738572	USP48	0.000246013	1.4287
ILMN_3249167	SNORA63	0.00174635	1.42866
ILMN_1674193	EMX1	0.00233704	1.42865
ILMN_1678775	CLEC2D	2.01939e-05	1.42843
ILMN_1762718	CMTM4	0.000196395	1.42825
ILMN_1746618	PAQR7	0.000955573	1.42812
ILMN_1713491	VAMP2	0.0418464	1.4281
ILMN_1726169	EDF1	0.00802643	1.42808
ILMN_1682147	HOOK2	0.00376468	1.42802
ILMN_1716400	FOXM1	0.000174215	1.42782
ILMN_1715555	DBP	0.0146883	1.42771
ILMN_1718207	SETDB1	0.00682567	1.42745
ILMN_1681503	MCM2	0.000290866	1.42729
ILMN_1779064	KLC2	0.00618078	1.42686
ILMN_1709659	TMEM151A	0.0021294	1.42677
ILMN_1814998	FKSG30	0.0153908	1.42671
ILMN_1786658	BOLA3	0.0032178	1.42648
ILMN_1813975	ADI1	0.000348885	1.42617
ILMN_2407811	NEURL4	0.00262722	1.42578
ILMN_1789007	APOC1	0.0129858	1.42567
ILMN_1751395	KRI1	0.000548884	1.4255
ILMN_3253471	KLHL29	1.39059e-06	1.42546
ILMN_1727809	STK35	0.000231836	1.4252
ILMN_1689800	MRTO4	0.000686239	1.42467
ILMN_1693242	ZNF296	0.00269872	1.42463
ILMN_1669928	ARHGEF16	0.0045781	1.42462
ILMN_1801348	GOT2	0.000185886	1.42443
ILMN_1732127	RBKS	0.00989871	1.42424
ILMN_3269537	LOC100130562	0.0137267	1.42407
ILMN_2286870	CSNK1D	0.00893335	1.42392
ILMN_1762225	DDX49	0.00186802	1.42368
ILMN_1651504	FAM193A	0.00305198	1.42348
ILMN_1668246	TMEM52	0.00622248	1.4234
ILMN_1684051	WASF2	0.00293214	1.42302
ILMN_1700461	AARSD1	0.00107614	1.42266
ILMN_1807535	YWHAE	0.00800214	1.42232
ILMN_3245236	FBRS	0.026025	1.42208
ILMN_1715674	ITPK1	0.000748255	1.42175
ILMN_1801600	CCDC97	0.00613648	1.42174
ILMN_1795344	GOLPH4	0.00591262	1.42154
ILMN_1778337	TCF2	0.000501942	1.42122
ILMN_1682957	PACSIN3	0.0033236	1.42101
ILMN_1682775	EDN1	0.000367342	1.4207
ILMN_1719232	DGCR14	0.0170892	1.42001
ILMN_2355665	MTP18	0.0142608	1.41981
ILMN_2172174	NP	2.16313e-05	1.41969
ILMN_1738530	ATAD3A	0.00382761	1.41933
ILMN_1661306	LOC643433	0.0149897	1.41886
ILMN_1682938	ARF3	0.00914868	1.41885
ILMN_1718706	ERAL1	0.0079329	1.41855
ILMN_1786168	LOC400464	5.2418e-06	1.41844
ILMN_1781560	ST3GAL6	0.00459046	1.41803
ILMN_1669645	PKD1	0.00366149	1.41774
ILMN_1719204	PRPF31	0.0204593	1.41767
ILMN_2383305	GPATCH4	0.0018413	1.41751
ILMN_1794046	MTX2	0.000806661	1.41748
ILMN_1716053	AK2	3.75769e-06	1.41726
ILMN_2078466	DZIP1L	4.71231e-05	1.41717
ILMN_1740234	GSTO2	0.000724175	1.41715
ILMN_1697189	PNCK	1.22676e-06	1.41644
ILMN_2152257	SSTR2	0.00454386	1.41602
ILMN_1802089	SYMPK	0.00159237	1.41574
ILMN_1740395	RAVER1	0.00266622	1.41541
ILMN_1771120	TMEM45B	0.0022171	1.41501
ILMN_3286813	LOC391019	4.18377e-05	1.41487
ILMN_1754235	SLC35C2	0.0291643	1.41476
ILMN_1705733	KIAA0460	0.00539666	1.41467
ILMN_1707804	SULT1A3	0.00109346	1.41454
ILMN_2323944	FAM110A	6.4575e-06	1.41446
ILMN_2274180	MKKS	0.000341111	1.41437
ILMN_1776582	PDK3	1.61289e-06	1.41399
ILMN_1656399	TCEAL8	0.0011772	1.41367
ILMN_2341952	MRPL35	0.00107528	1.41325
ILMN_1743205	ABCA7	0.00337012	1.41315
ILMN_3291511	LOC100131971	0.0243413	1.41286
ILMN_1676036	LOC649679	0.000158676	1.41277
ILMN_1773780	FAM173A	0.0190131	1.41269
ILMN_2336109	L3MBTL2	0.00272163	1.41224
ILMN_1680104	SLC35C1	0.00290771	1.41182
ILMN_2378708	TAF6	0.00695636	1.41176
ILMN_2106167	RAP1GDS1	1.27072e-06	1.41099
ILMN_1676846	ABCE1	0.000396735	1.41095
ILMN_1769433	IQGAP2	0.000668483	1.41094
ILMN_2371055	EFNA1	0.00448714	1.41078
ILMN_2359945	CES1	2.96253e-05	1.41064
ILMN_3288268	LOC100132499	0.00158478	1.41057
ILMN_3286685	LOC100133390	0.00128318	1.40998
ILMN_1672094	DLX1	0.000662963	1.4097
ILMN_2167252	FAM151A	0.0105123	1.40959
ILMN_1702783	LOC652595	0.00122215	1.40938
ILMN_3248247	LOC100134634	0.0100549	1.40933
ILMN_1780315	PUSL1	0.0184741	1.40926
ILMN_1755138	NEK8	0.00860333	1.40922
ILMN_1800750	ZNF692	0.00735822	1.40878
ILMN_2407482	ITPA	0.000635289	1.40871
ILMN_2078995	CSRNP3	0.000208386	1.40856
ILMN_1673207	KLF11	0.000952731	1.40836
ILMN_1653165	AAMP	0.0318068	1.40817
ILMN_2149566	VPS25	0.0319677	1.40802
ILMN_1782004	BAPX1	0.00412867	1.4078
ILMN_1748894	GTPBP3	0.000307287	1.40777
ILMN_1766803	TUBGCP6	0.0327888	1.40754
ILMN_2414848	TBRG4	0.00414154	1.40744
ILMN_2088612	XPO4	0.0130692	1.40733
ILMN_1653367	TAF12	0.000249015	1.40731
ILMN_1714990	DBT	4.67229e-05	1.4067
ILMN_1757210	CALML4	0.00513909	1.40653
ILMN_3229733	SIGMAR1	0.046019	1.40642
ILMN_3290019	LOC646753	0.0171437	1.40629
ILMN_1690907	CCR6	0.000241712	1.40568
ILMN_1716272	KBTBD8	6.51847e-06	1.40544
ILMN_1799535	GJB1	0.000769023	1.40495
ILMN_1721225	C20orf4	0.000769225	1.40478
ILMN_1718558	PARP12	0.00118208	1.40419
ILMN_2406439	SPTBN4	0.000154146	1.40418
ILMN_1657746	BPHL	0.000908059	1.40414
ILMN_1715968	MLL4	0.030133	1.40355
ILMN_1743747	RUSC1	0.00160528	1.40347
ILMN_1689720	PPP2R3B	0.000157555	1.40342
ILMN_2407124	MCM8	0.000552133	1.4034
ILMN_1797184	PKN3	0.00227756	1.40311
ILMN_1768743	FIP1L1	0.000669877	1.40309
ILMN_1809173	LOC729021	0.00420492	1.40309
ILMN_1686562	KIF13B	0.00813774	1.40295
ILMN_1696485	HNRNPAB	0.00156846	1.40286
ILMN_1813817	MRPL55	0.0189605	1.40272
ILMN_1738921	ACAA1	0.000257232	1.40246
ILMN_1744963	ERO1L	0.000198092	1.40225
ILMN_1756867	ATE1	0.00127091	1.40222
ILMN_1764207	RPRD1A	1.22992e-05	1.40221
ILMN_2057408	LOC388503	0.000830513	1.40198
ILMN_1743673	LOC729647	5.48043e-05	1.40158
ILMN_1749636	DNAJC22	0.00133624	1.40129
ILMN_1782129	ZBED4	0.0029347	1.40125
ILMN_1763129	DCTPP1	0.0138319	1.40114
ILMN_3297898	LOC729769	0.0036036	1.40076
ILMN_1753353	SLBP	0.0100466	1.40064
ILMN_1761260	COBLL1	0.00235925	1.40054
ILMN_1810992	CAD	0.000384118	1.40042
ILMN_2410772	KEAP1	0.00467501	1.40032
ILMN_3217276	LOC644517	0.000301748	1.40026
ILMN_1700349	ADCK4	0.000600507	1.40016
