# Supplementary material for: Mitochondrial Plasticity Promotes Resistance to Sorafenib and Vulnerability to STAT3 Inhibition in Human Hepatocellular Carcinoma
Source: Cancers (Basel). 2021 Nov 30;13(23):6029. doi: 10.3390/cancers13236029 (PMC8657239; doi:10.3390/cancers13236029)
Supplement: Supplementary file 1 [file cancers-13-06029-s001.zip › Supplementary dataset S2-Downregulated genes.xlsx]

## Sheet: Sheet2
Supplementary dataset S2.
Genes downregulated in sorafenib-resistant cells
PROBE_ID	SYMBOL	p-value	Fold Change
ILMN_2412336	AKR1C2	2.51231e-11	-29.2499
ILMN_1713124	AKR1C3	1.33582e-11	-20.7609
ILMN_1687757	AKR1C4	9.01723e-09	-18.5726
ILMN_1687301	VCAN	2.44508e-11	-16.5382
ILMN_1692861	UGT2A3	7.77547e-12	-10.0304
ILMN_2058251	VIM	3.31394e-10	-8.9288
ILMN_1782538	VIM	1.37957e-10	-8.3139
ILMN_1688780	S100A4	3.23713e-09	-7.99348
ILMN_1713636	S100A6	5.07852e-10	-7.80287
ILMN_1684306	S100A4	6.1478e-10	-7.3389
ILMN_2184184	ANXA1	3.49356e-09	-5.87982
ILMN_1780170	APOD	0.00109815	-5.79623
ILMN_1712522	CEACAM6	7.08509e-11	-5.42955
ILMN_1756071	MFGE8	3.11782e-06	-5.34186
ILMN_1733998	DHRS9	1.05524e-09	-5.33381
ILMN_1797776	PRSS23	1.83075e-09	-5.28042
ILMN_1655595	SERPINE2	4.07006e-09	-5.18807
ILMN_1721876	TIMP2	7.32037e-09	-5.0429
ILMN_1752502	HKDC1	1.02874e-12	-4.94841
ILMN_1679194	UGT2B7	1.28745e-10	-4.91219
ILMN_1678939	VNN2	1.12579e-08	-4.90354
ILMN_1755897	UGT2B7	7.95259e-10	-4.86832
ILMN_1811387	TFF3	3.11694e-06	-4.74471
ILMN_1800642	RELN	5.24629e-08	-4.73378
ILMN_1663866	TGFBI	2.23425e-07	-4.68989
ILMN_2174437	CIDEC	4.60711e-07	-4.59376
ILMN_1799020	MUC12	7.69595e-10	-4.4248
ILMN_1750324	IGFBP5	1.04401e-09	-4.42083
ILMN_1810289	FER1L3	5.8538e-09	-4.37559
ILMN_1788416	FAM108C1	1.92924e-09	-4.09571
ILMN_3251540	GSTA2	2.50278e-09	-4.09222
ILMN_1705243	SERPINA7	2.26938e-11	-3.93335
ILMN_1765446	EMP3	2.21703e-06	-3.90263
ILMN_2168747	GSTA2	5.77159e-09	-3.89555
ILMN_3302919	MYOF	2.3964e-09	-3.89
ILMN_1810942	CYP3A5	3.61009e-09	-3.85815
ILMN_1780693	HSD3B1	8.47252e-09	-3.8314
ILMN_1792748	CPS1	4.25244e-07	-3.66714
ILMN_1808677	UGT2B17	1.65279e-08	-3.644
ILMN_1680132	CADM1	2.86829e-09	-3.59371
ILMN_1810233	UGT2B11	3.89381e-08	-3.58452
ILMN_1677814	ABCC3	4.68777e-08	-3.49262
ILMN_2189027	LIPG	6.48702e-09	-3.40407
ILMN_1660436	HSPA1B	1.80991e-06	-3.36437
ILMN_1701831	GSTA1	1.66871e-05	-3.21748
ILMN_1742534	COL4A5	6.34807e-09	-3.20282
ILMN_1754969	LMCD1	4.18257e-11	-3.17165
ILMN_1755720	SLC2A2	8.82018e-08	-3.13822
ILMN_2374036	CTSL1	3.52104e-06	-3.12208
ILMN_1773337	DKK1	6.95694e-09	-3.09459
ILMN_1812995	CTSL1	2.62223e-05	-3.09028
ILMN_1733756	COL12A1	6.84488e-09	-3.06117
ILMN_1691747	KHDRBS3	1.10258e-08	-3.02475
ILMN_1655613	GSTA2	2.11037e-05	-3.01816
ILMN_2087692	CYBRD1	2.19254e-09	-2.98521
ILMN_1758864	VNN2	4.81666e-08	-2.94452
ILMN_1769299	MTMR11	2.57809e-07	-2.93694
ILMN_1753005	RELN	4.04842e-09	-2.93203
ILMN_2162819	UGT2B11	5.69407e-08	-2.92591
ILMN_1757406	HIST1H1C	3.29239e-08	-2.92504
ILMN_1653711	FZD2	1.01582e-08	-2.91054
ILMN_1782937	LOC647169	2.59887e-06	-2.90511
ILMN_1769580	PRSS35	2.41516e-07	-2.87564
ILMN_1670385	TUBAL3	1.77735e-09	-2.84936
ILMN_1775405	ARL4A	1.26945e-08	-2.82297
ILMN_1695397	LOC644151	3.17808e-07	-2.814
ILMN_1742866	F2R	1.11151e-06	-2.80837
ILMN_2377900	MAP1B	5.43882e-10	-2.78916
ILMN_1740443	LOC728811	5.58862e-07	-2.77286
ILMN_1725417	NELL2	1.04143e-06	-2.69224
ILMN_1668593	HPX	7.44759e-07	-2.68285
ILMN_1689842	SC4MOL	1.44799e-06	-2.68102
ILMN_1774077	GBP2	3.30046e-06	-2.66621
ILMN_2355831	FHL2	5.12383e-09	-2.66508
ILMN_1791726	TUBB3	1.52368e-07	-2.64862
ILMN_1714523	HEPH	3.10611e-10	-2.63561
ILMN_1811702	GRN	2.53535e-06	-2.59221
ILMN_1719599	SYTL4	6.60723e-08	-2.59122
ILMN_1811767	INHBE	7.45662e-07	-2.58586
ILMN_2186061	PFKFB3	1.53866e-06	-2.56658
ILMN_1790778	PNMA2	2.05161e-08	-2.56349
ILMN_1764309	ADH1A	3.6447e-05	-2.53248
ILMN_1805003	UGT2B4	3.82383e-07	-2.51956
ILMN_1814015	CDH17	9.8228e-08	-2.51794
ILMN_1737041	HABP2	1.79294e-07	-2.51468
ILMN_1789502	GPC4	4.24091e-09	-2.48495
ILMN_2343278	PPAP2A	4.48765e-08	-2.47941
ILMN_1722809	NRCAM	2.15639e-07	-2.47923
ILMN_1689037	LIPG	1.4159e-07	-2.47778
ILMN_1727815	CFI	5.27781e-09	-2.42991
ILMN_2214197	TP53INP1	6.31025e-06	-2.41845
ILMN_1716265	PGM2L1	6.37971e-08	-2.4148
ILMN_1714108	TP53INP1	1.42926e-07	-2.41368
ILMN_1679262	DPYSL3	4.25751e-08	-2.41169
ILMN_1801043	GSN	5.50983e-06	-2.3911
ILMN_2115434	RAB32	9.42032e-07	-2.38808
ILMN_2113490	NTN4	1.48544e-08	-2.38512
ILMN_1712305	CYBRD1	2.14654e-06	-2.36225
ILMN_2387952	FAM134B	4.11003e-07	-2.36079
ILMN_1813314	HIST1H2BK	5.19254e-06	-2.35897
ILMN_3251497	GSTA1	6.58912e-06	-2.34058
ILMN_1748970	PRR15L	3.26878e-07	-2.33576
ILMN_1687978	PHLDA1	0.000172308	-2.33315
ILMN_1741727	QPCT	5.57391e-08	-2.31951
ILMN_1713496	ST3GAL5	9.62358e-07	-2.31533
ILMN_1735762	NPNT	3.30129e-06	-2.30834
ILMN_1661628	LOC653110	2.11001e-07	-2.30557
ILMN_2132982	IGFBP5	3.76039e-09	-2.30506
ILMN_1740717	ADH1C	7.59278e-08	-2.30336
ILMN_2384181	DHRS9	1.59388e-07	-2.29909
ILMN_1777190	CFD	5.23045e-06	-2.29526
ILMN_2352131	ERBB2	4.71581e-08	-2.29142
ILMN_1671404	SVIL	2.6241e-05	-2.29043
ILMN_2336609	SYTL2	4.47537e-08	-2.28215
ILMN_1686116	THBS1	4.31175e-07	-2.27534
ILMN_1657295	CPA6	8.70691e-09	-2.26862
ILMN_1717326	SLC29A3	8.27345e-06	-2.26517
ILMN_2326197	FGL1	4.69848e-07	-2.26319
ILMN_1789074	HSPA1A	0.000296387	-2.25853
ILMN_1815500	ITPR3	1.03321e-06	-2.25368
ILMN_2174189	DKK1	5.3666e-08	-2.25322
ILMN_1654441	OAT	8.30344e-06	-2.25039
ILMN_1705247	ACSL5	1.56351e-08	-2.24199
ILMN_1685824	B4GALT5	3.97115e-08	-2.23968
ILMN_1696584	ORM1	2.27027e-05	-2.23706
ILMN_1714861	CD68	1.36462e-05	-2.23515
ILMN_1806023	JUN	1.43518e-05	-2.21538
ILMN_1791123	TMPRSS2	3.81924e-07	-2.21028
ILMN_1723287	SLC6A16	1.67138e-06	-2.2008
ILMN_1654072	CX3CL1	2.45922e-05	-2.19362
ILMN_2075643	ANKRD29	6.84222e-06	-2.18144
ILMN_1781225	FLJ35801	1.28028e-05	-2.18137
ILMN_3268380	LOC100130846	6.79548e-06	-2.18018
ILMN_1701413	PIGQ	0.00171822	-2.17507
ILMN_2174369	ELOVL5	3.28667e-05	-2.17384
ILMN_1739144	SI	8.05875e-06	-2.17377
ILMN_1670652	CYP2C9	0.000159415	-2.17006
ILMN_2113470	GSTA1	4.26665e-06	-2.16807
ILMN_1672124	C4orf18	7.57811e-06	-2.16752
ILMN_1795298	GPER	5.75509e-05	-2.16388
ILMN_2403965	TXNDC5	1.01836e-05	-2.158
ILMN_2166457	HPGD	4.99881e-06	-2.15618
ILMN_2068747	OAT	1.54662e-05	-2.15408
ILMN_2052373	RAB17	0.00295738	-2.15292
ILMN_1673113	F2RL1	9.12704e-07	-2.15071
ILMN_2411236	NRCAM	0.000113505	-2.14688
ILMN_1714820	ITGB1	8.02629e-06	-2.13929
ILMN_1701007	PON3	0.000118457	-2.13514
ILMN_1729191	CYP2C19	8.22716e-07	-2.13368
ILMN_2364852	BTN2A1	5.00583e-07	-2.12324
ILMN_1758623	HIST1H2BD	1.31078e-06	-2.12217
ILMN_1785646	PMP22	4.60141e-06	-2.11338
ILMN_1659753	LAMP2	4.54141e-07	-2.1132
ILMN_2412192	CFH	2.02525e-07	-2.1121
ILMN_2388466	TIA1	1.24491e-06	-2.11149
ILMN_1676197	LRP11	3.89363e-06	-2.10524
ILMN_1686679	ZNF462	8.59072e-11	-2.10137
ILMN_2218935	GPR37	2.3358e-07	-2.09929
ILMN_2149226	CAV1	1.59012e-06	-2.09283
ILMN_2045849	SI	9.13156e-08	-2.08226
ILMN_1651496	HIST1H2BD	9.93736e-07	-2.08036
ILMN_1807662	IGF2R	0.000185097	-2.07823
ILMN_3191913	LOC100130846	8.14323e-06	-2.07512
ILMN_1810910	CFH	5.57361e-08	-2.07449
ILMN_1712390	CUTA	5.23043e-06	-2.07279
ILMN_2404065	APP	0.000436652	-2.07098
ILMN_1661137	SH3RF2	1.12255e-06	-2.06854
ILMN_2399300	NAV2	1.92497e-07	-2.06646
ILMN_1654398	RGL1	1.13433e-05	-2.06561
ILMN_1744023	MGC18216	1.64507e-06	-2.06377
ILMN_3301372	LOC730167	2.5073e-07	-2.06279
ILMN_1679725	PCYOX1	1.5808e-05	-2.06058
ILMN_1676891	CDC2L6	1.5361e-06	-2.05632
ILMN_1661078	LOC644844	0.00457201	-2.05441
ILMN_3196690	C22orf27	0.000282216	-2.05065
ILMN_1749327	MAPK13	0.000821443	-2.0467
ILMN_1815673	DKK3	9.98777e-06	-2.0424
ILMN_1767665	LOC493869	2.5327e-06	-2.04179
ILMN_2120273	AP1S2	0.000175606	-2.0395
ILMN_1667018	ACE2	1.03608e-06	-2.03594
ILMN_2406035	LAMA3	1.70641e-07	-2.031
ILMN_2370882	ACSL5	1.49867e-05	-2.02915
ILMN_2404688	NUPR1	3.12864e-05	-2.02895
ILMN_1691410	BAMBI	3.41177e-05	-2.02567
ILMN_1667966	C1orf24	9.03905e-09	-2.02402
ILMN_1792689	HIST1H2AC	3.18216e-07	-2.02257
ILMN_2398159	DKK3	1.71092e-06	-2.02117
ILMN_2370976	FER1L3	1.24312e-07	-2.01723
ILMN_1678671	KLHL24	2.77961e-07	-2.01328
ILMN_3235727	LOC100128641	6.03198e-07	-2.01322
ILMN_1778240	GFOD1	3.41177e-06	-2.00476
ILMN_1671565	RNASET2	0.000651236	-2.00176
ILMN_1658702	HIST1H2BJ	4.58108e-07	-2.00141
ILMN_1761941	C4orf18	3.82198e-05	-2.0008
ILMN_2227757	PCDHB2	6.86745e-05	-1.99672
ILMN_1694548	ANXA3	6.56239e-05	-1.99419
ILMN_3305735	LOC730101	3.68497e-05	-1.99255
ILMN_1725427	B2M	9.21385e-06	-1.98904
ILMN_1773417	AKR1C2	3.87745e-07	-1.98874
ILMN_1785071	SEPP1	3.97682e-05	-1.98397
ILMN_1764177	JARID2	3.92573e-06	-1.98389
ILMN_2404063	APP	8.42858e-06	-1.9806
ILMN_1709750	SUSD1	5.33336e-08	-1.9778
ILMN_2041236	GARNL4	0.00155576	-1.9756
ILMN_1726245	TGFBR2	9.40892e-06	-1.97346
ILMN_1812392	TMSB10	0.000896475	-1.97214
ILMN_2118229	NAPEPLD	1.70767e-05	-1.972
ILMN_1682828	FGL1	3.49213e-06	-1.97071
ILMN_1712634	TIA1	8.04558e-06	-1.96925
ILMN_1760556	C1orf63	0.000327655	-1.96868
ILMN_1689318	NUAK1	9.71638e-06	-1.9686
ILMN_1798841	PLCXD3	1.28932e-07	-1.96761
ILMN_2384241	TGFBR2	2.78956e-06	-1.96755
ILMN_2225537	PTGR1	1.16834e-05	-1.96515
ILMN_1788122	GSTA5	1.66488e-06	-1.96339
ILMN_1742444	UGT2B10	4.6974e-08	-1.96297
ILMN_1779017	FGA	3.17577e-05	-1.95807
ILMN_2339202	KTN1	5.98169e-06	-1.95576
ILMN_1660732	PPP2R2B	7.97788e-06	-1.95213
ILMN_1741422	FUT8	0.000252366	-1.95083
ILMN_2408572	RNASE4	1.64489e-05	-1.94667
ILMN_1673282	LAMP2	2.20093e-07	-1.94483
ILMN_2243687	LAMP2	1.89822e-05	-1.94003
ILMN_1691237	CAP2	7.17962e-05	-1.936
ILMN_1789457	GNL1	0.000503179	-1.93269
ILMN_2079786	NUAK1	0.000110437	-1.9318
ILMN_2315979	LBH	1.41846e-06	-1.93084
ILMN_2198912	TTR	7.53989e-06	-1.93017
ILMN_1788783	TRAM2	9.55745e-06	-1.92855
ILMN_3237926	CCNJL	1.3341e-05	-1.92839
ILMN_1736670	PPP1R3C	1.34647e-06	-1.9277
ILMN_1711899	ANXA2	8.16428e-05	-1.92602
ILMN_2305225	NDRG4	4.71365e-07	-1.92245
ILMN_1659544	STX3	2.78706e-06	-1.92054
ILMN_1700518	HMGN4	6.5493e-09	-1.91932
ILMN_2355559	PSAP	9.10198e-05	-1.9174
ILMN_1712082	GCNT3	9.47647e-07	-1.91685
ILMN_1801766	CCDC109B	5.61943e-05	-1.91567
ILMN_1728662	ALDH3B1	0.000121985	-1.91479
ILMN_1698725	FRMD3	2.66842e-05	-1.91476
ILMN_1685387	PIGR	3.32892e-06	-1.91367
ILMN_1682910	SLC35B3	3.76829e-06	-1.91174
ILMN_2089875	TNFSF4	5.06158e-07	-1.90936
ILMN_2383934	ITGB1	1.01911e-06	-1.90934
ILMN_1815745	SOX4	7.59079e-07	-1.90917
ILMN_1702973	TMEM166	1.57363e-06	-1.90677
ILMN_3251506	ZNF69	3.38431e-05	-1.90666
ILMN_3243142	KAT2B	4.17457e-05	-1.90542
ILMN_1761425	OLFML2A	8.97697e-07	-1.90458
ILMN_2148913	TMEM45A	3.35695e-05	-1.89949
ILMN_1684836	AKAP12	7.21011e-07	-1.89885
ILMN_2352097	GPR56	1.25434e-05	-1.8978
ILMN_1779014	TSPYL1	2.13307e-06	-1.89464
ILMN_1687384	IFI6	0.000408159	-1.894
ILMN_2096719	GRK5	1.79674e-06	-1.8918
ILMN_1795286	C6orf47	0.00193035	-1.88635
ILMN_1807042	MARCKS	2.48077e-05	-1.88603
ILMN_2195482	CACNB3	4.03546e-06	-1.88597
ILMN_1727087	GJA1	3.88235e-05	-1.88513
ILMN_1701514	TRAF3IP2	0.000826699	-1.88212
ILMN_1655614	DSP	5.86216e-05	-1.87662
ILMN_1779597	CIDEC	1.29369e-05	-1.87567
ILMN_1766411	AP1S2	6.38426e-07	-1.87529
ILMN_1700888	ENPP1	7.77332e-06	-1.87249
ILMN_1740571	LOC647859	1.03416e-06	-1.87001
ILMN_1791296	DPY19L1	6.23614e-06	-1.8693
ILMN_1662038	LARGE	6.55761e-05	-1.86696
ILMN_2292646	GAD1	3.28083e-06	-1.86584
ILMN_1752810	LARP6	0.00011861	-1.86543
ILMN_1724480	AXIN2	2.41933e-05	-1.86535
ILMN_1751120	HIST1H4H	1.49562e-06	-1.86303
ILMN_1658926	NOTCH3	2.18919e-06	-1.86167
ILMN_2393994	CSPP1	5.764e-07	-1.85994
ILMN_1709882	ICK	4.09781e-06	-1.85868
ILMN_1815205	LYZ	3.58942e-05	-1.85212
ILMN_1783852	CD164	0.000926188	-1.85009
ILMN_1746085	IGFBP3	3.76379e-06	-1.84827
ILMN_1749109	PSAP	9.15924e-05	-1.84714
ILMN_1721626	ARID5B	4.49188e-07	-1.84496
ILMN_2098616	C5orf39	0.000298232	-1.844
ILMN_1696962	PDZD8	7.14763e-06	-1.84354
ILMN_1699695	TNFRSF21	1.04121e-05	-1.84286
ILMN_2121816	GPR137B	0.000110037	-1.83717
ILMN_1775829	PERP	0.000414722	-1.8342
ILMN_1718946	ADAM10	6.03094e-05	-1.83221
ILMN_1681087	SLC7A10	5.47546e-05	-1.82959
ILMN_2361570	SNX14	5.02085e-05	-1.82825
ILMN_2334760	ARMCX3	9.579e-05	-1.82802
ILMN_1788874	SERPINA3	3.69031e-06	-1.82796
ILMN_1694840	MATN2	1.43208e-05	-1.82726
ILMN_1654322	ATP1B3	9.75719e-06	-1.82636
ILMN_1655261	ERP27	1.03409e-05	-1.82353
ILMN_1669674	CNPY3	0.000124153	-1.82277
ILMN_1675939	IFNGR1	8.18422e-07	-1.82062
ILMN_1806733	COL18A1	0.00102573	-1.81989
ILMN_2153332	ATXN1	2.48834e-06	-1.81871
ILMN_3239181	ITPRIP	0.000346928	-1.81864
ILMN_1764166	BCKDHB	6.24213e-06	-1.81827
ILMN_1657803	CFH	5.36202e-08	-1.81409
ILMN_1772686	FGD3	0.000927481	-1.81392
ILMN_1772241	SQLE	2.21365e-06	-1.81287
ILMN_2317581	SHANK3	0.000630266	-1.81269
ILMN_1734559	SORD	2.53953e-05	-1.81091
ILMN_3224934	SFRS18	2.21148e-07	-1.80829
ILMN_1678922	HERC4	1.03968e-05	-1.80808
ILMN_1763837	ANPEP	0.00385729	-1.80805
ILMN_1742620	LGSN	1.27644e-06	-1.80261
ILMN_1690223	CNTNAP2	2.26599e-05	-1.80254
ILMN_1772951	ST6GALNAC1	1.48641e-07	-1.80137
ILMN_1719986	PIK3IP1	1.32247e-06	-1.79844
ILMN_1710209	MFSD6	3.12268e-05	-1.79762
ILMN_1713892	C4orf34	1.33208e-06	-1.79739
ILMN_1764096	CCBL1	0.000637107	-1.79553
ILMN_2388701	ST3GAL5	0.000135954	-1.7954
ILMN_1701247	LOC132241	2.09207e-07	-1.79435
ILMN_2363586	SDCBP	0.000152723	-1.79384
ILMN_1669362	IGFBP6	0.000136495	-1.7923
ILMN_2075440	PDIA3P	1.41233e-06	-1.79219
ILMN_3277332	LOC441453	1.34257e-05	-1.79171
ILMN_1653283	APP	8.50042e-07	-1.79102
ILMN_2384056	GPER	0.000102894	-1.79055
ILMN_1659688	LGALS3BP	1.86161e-07	-1.78835
ILMN_1770922	TMEM45A	2.47776e-07	-1.78649
ILMN_1810560	P8	1.30166e-05	-1.78463
ILMN_1813669	ANKS1A	3.96453e-06	-1.78451
ILMN_1747759	WSB1	1.79204e-05	-1.7844
ILMN_1689976	EDIL3	3.2438e-07	-1.78411
ILMN_2206500	UGT2B4	3.09969e-07	-1.78144
ILMN_1714567	AHNAK	0.00010157	-1.77975
ILMN_2391231	SORD	3.11763e-05	-1.77842
ILMN_1669032	PPIC	5.49439e-05	-1.77834
ILMN_1803811	TRIB1	5.18711e-10	-1.77792
ILMN_1666269	CTSZ	2.4039e-05	-1.77789
ILMN_1805192	ITPRIP	7.92221e-06	-1.77755
ILMN_1730809	SLC29A2	0.000748089	-1.77681
ILMN_1811330	FAM134B	1.02715e-06	-1.77605
ILMN_1805519	CD24	1.1756e-06	-1.77227
ILMN_1805481	TRMT11	0.000203255	-1.77097
ILMN_1792518	STX7	5.57765e-05	-1.76953
ILMN_1696510	GPR89C	0.000116834	-1.7633
ILMN_3298400	LOC731954	2.32039e-06	-1.76316
ILMN_2363591	SDCBP	1.20929e-06	-1.7625
ILMN_1685371	SUMF2	0.000943191	-1.762
ILMN_1785191	TMEM14A	5.49089e-06	-1.76116
ILMN_1745213	PCDHB3	7.50948e-05	-1.75897
ILMN_1684755	KAZALD1	0.00116037	-1.75891
ILMN_2381945	FGA	0.000331506	-1.75702
ILMN_1726682	LOC146909	1.50722e-07	-1.75615
ILMN_1742547	NRP1	5.14275e-05	-1.75549
ILMN_1703273	UACA	9.74158e-05	-1.75426
ILMN_1779228	CDH2	4.04014e-05	-1.75056
ILMN_2401978	STAT3	9.78707e-05	-1.74873
ILMN_1705442	CMTM3	4.79442e-05	-1.74826
ILMN_1809566	ZSCAN16	1.51636e-05	-1.74762
ILMN_2334765	ARMCX3	3.89728e-05	-1.74439
ILMN_3261938	LOC100130154	6.08159e-05	-1.74322
ILMN_2237428	SCD5	6.32882e-05	-1.74316
ILMN_1753342	SAT1	4.92149e-05	-1.74282
ILMN_1735680	TMEM30A	6.76574e-05	-1.7425
ILMN_1787127	SLC43A2	0.00210234	-1.7414
ILMN_1658494	C13orf15	2.45596e-06	-1.74139
ILMN_1781859	UGT2B28	1.52283e-07	-1.74127
ILMN_2041190	F2RL1	0.000281816	-1.73977
ILMN_1758673	SLC44A1	1.29512e-05	-1.73821
ILMN_1740180	SNX3	4.64759e-05	-1.73553
ILMN_2375879	VEGFA	0.00475116	-1.7353
ILMN_2366192	FGL1	2.54856e-05	-1.73427
ILMN_1746090	STT3A	1.7492e-05	-1.73413
ILMN_1722869	PDZD3	1.34838e-05	-1.73385
ILMN_1761820	EDARADD	0.000618597	-1.73344
ILMN_1658830	C10orf26	0.000373045	-1.73206
ILMN_1762033	NAPEPLD	4.78632e-06	-1.73081
ILMN_1725594	FAM188A	0.000101152	-1.73007
ILMN_1720511	LRRN1	3.00326e-06	-1.72977
ILMN_1681703	FOXO3	4.53952e-05	-1.72938
ILMN_1658800	BRPF3	1.65151e-05	-1.72783
ILMN_1746831	ZNF114	3.18936e-07	-1.7242
ILMN_1763260	HIF1A	1.65006e-06	-1.72285
ILMN_1658498	SLC44A3	2.97713e-06	-1.72258
ILMN_2415329	SULT1C2	4.94969e-06	-1.72108
ILMN_1668924	BEGAIN	0.000235682	-1.71848
ILMN_1747650	BMP6	5.04472e-08	-1.71799
ILMN_1759910	SERPINA5	0.000175608	-1.71544
ILMN_1699631	GATS	0.00127771	-1.71512
ILMN_1811468	IRX3	0.000337691	-1.71421
ILMN_1730433	CD2AP	3.31635e-05	-1.71216
ILMN_1729117	COL5A2	5.12718e-08	-1.71134
ILMN_1764082	MBOAT1	1.08301e-08	-1.71077
ILMN_3236637	PIP4K2A	3.76165e-06	-1.71074
ILMN_1771987	SLC44A2	1.06997e-06	-1.70979
ILMN_1673363	CD97	0.00426005	-1.7092
ILMN_1676213	SRPX2	6.91659e-07	-1.70858
ILMN_2158003	KIAA1683	7.0224e-05	-1.7082
ILMN_1763605	DIDO1	1.78341e-06	-1.70699
ILMN_1744937	PTPRM	9.3651e-06	-1.70698
ILMN_1709032	FYCO1	1.24087e-05	-1.70675
ILMN_3248781	SDHAP2	2.89154e-05	-1.7044
ILMN_2152581	STK38	8.22845e-08	-1.70439
ILMN_1786041	ASB9	0.000754671	-1.70369
ILMN_2048607	ANKRD9	0.000810648	-1.70307
ILMN_1760575	PTP4A1	0.000590503	-1.7029
ILMN_1740900	BMP4	0.00111309	-1.70237
ILMN_2124241	MUM1L1	3.42891e-06	-1.70222
ILMN_1816925	LOC728473	0.000802822	-1.70145
ILMN_1718988	DAZAP2	0.000390339	-1.70136
ILMN_1715635	ATP6V0E1	1.97519e-05	-1.70069
ILMN_1778691	TIA1	0.000158872	-1.69759
ILMN_1757552	PTRF	8.59232e-05	-1.69661
ILMN_1692517	LOC653381	6.72462e-06	-1.69614
ILMN_1713744	C14orf132	2.22824e-07	-1.69392
ILMN_1673604	YIPF3	6.00591e-07	-1.69107
ILMN_1794803	NDP	5.57724e-07	-1.68952
ILMN_1753766	LOC388743	2.58054e-05	-1.689
ILMN_1732967	KIAA1949	6.56397e-06	-1.68803
ILMN_2264625	NIPBL	0.000379526	-1.68639
ILMN_1671151	RARB	3.96679e-06	-1.686
ILMN_1736021	PRPF4B	7.32715e-05	-1.68394
ILMN_1844692	FOXO3	1.36402e-05	-1.68293
ILMN_2337740	TULP4	4.407e-05	-1.68293
ILMN_1795937	VIL2	1.86683e-05	-1.68272
ILMN_1651282	COL17A1	0.00014384	-1.68185
ILMN_1798975	EGFR	7.69724e-05	-1.68156
ILMN_3247548	CYMP	1.95002e-06	-1.67945
ILMN_2143685	CLDN7	0.00375174	-1.67916
ILMN_1676528	BTN3A2	9.952e-06	-1.6772
ILMN_1670870	ALCAM	0.000543151	-1.67639
ILMN_1708147	TBPL1	1.5968e-05	-1.6762
ILMN_2170080	CIDECP	0.000456172	-1.67524
ILMN_3249645	HSPA13	3.93534e-05	-1.67519
ILMN_1771964	GSTA4	8.6439e-06	-1.67491
ILMN_1691731	PARP14	9.07532e-05	-1.67481
ILMN_2179083	LOXL4	1.0736e-05	-1.67472
ILMN_1721102	LOC255326	2.6165e-05	-1.67242
ILMN_1720965	TULP4	8.60255e-06	-1.67143
ILMN_2058795	PGCP	0.000186333	-1.67108
ILMN_1684385	COPB2	0.000252246	-1.66966
ILMN_1720303	OSTM1	2.99775e-06	-1.66919
ILMN_1814296	TRPM6	0.000275668	-1.66895
ILMN_1735499	DCBLD2	3.55945e-05	-1.66722
ILMN_1771308	BAAT	4.19911e-06	-1.6653
ILMN_1667315	STAG3L1	8.55548e-06	-1.66496
ILMN_1765860	DOCK11	2.68745e-05	-1.66431
ILMN_1668411	FHL2	1.93039e-06	-1.66341
ILMN_1785175	SWAP70	1.27811e-05	-1.66202
ILMN_1806634	NNT	0.000319134	-1.662
ILMN_1660063	POLE4	1.56583e-05	-1.66179
ILMN_1664303	HTATIP2	5.51491e-06	-1.66164
ILMN_3272378	EZR	0.000761024	-1.66094
ILMN_1678652	C10orf61	4.11835e-05	-1.66022
ILMN_1798705	CCNC	1.35034e-05	-1.66001
ILMN_3230435	LOC729086	0.00301431	-1.65879
ILMN_1653319	MC1R	0.00184171	-1.6582
ILMN_1769810	ARL6IP5	0.000269266	-1.65772
ILMN_2390472	TTC14	5.9389e-07	-1.65753
ILMN_1746819	C5	0.000461716	-1.655
ILMN_1790891	CKAP4	8.89658e-06	-1.65432
ILMN_2375002	MAP4K4	2.30882e-05	-1.65427
ILMN_2353033	FUBP3	0.000699338	-1.65424
ILMN_1792455	TMEM158	9.05924e-05	-1.65366
ILMN_1716547	NAGK	2.46399e-05	-1.65348
ILMN_1697117	TBP	1.23858e-06	-1.65176
ILMN_1704154	TNFRSF19	0.00116118	-1.64969
ILMN_1762764	SH3BGRL2	8.57762e-07	-1.64928
ILMN_1803429	CD44	2.57406e-06	-1.6492
ILMN_1698019	LGMN	0.000516928	-1.64829
ILMN_2060413	CD24	1.68059e-05	-1.64756
ILMN_1704531	PTGR1	1.16843e-05	-1.64744
ILMN_1759792	CLIP4	0.00010344	-1.64738
ILMN_1721901	CTNNAL1	3.28391e-05	-1.64639
ILMN_1679640	FXR1	0.000111136	-1.64628
ILMN_2375003	MAP4K4	1.04412e-05	-1.64614
ILMN_1662192	ZNF248	0.000892511	-1.64553
ILMN_1748124	TSC22D3	2.4842e-06	-1.64496
ILMN_1656487	FGA	0.00168729	-1.64455
ILMN_1720865	OSBPL7	4.32541e-05	-1.6445
ILMN_2228732	CCNG2	0.00101298	-1.64313
ILMN_2223903	PPIC	0.000159689	-1.64283
ILMN_1805512	WDR13	8.14553e-05	-1.64247
ILMN_1704353	IGSF3	4.67582e-08	-1.64155
ILMN_1737314	BCL6	2.63895e-06	-1.64151
ILMN_1748685	TRIM31	0.00107432	-1.64142
ILMN_1655469	TSPAN3	0.000505585	-1.6412
ILMN_1790518	PHF16	1.65874e-05	-1.64096
ILMN_1688242	C6	1.12222e-05	-1.63949
ILMN_1691662	LOC100101266	3.01534e-05	-1.63776
ILMN_1775830	TM4SF20	0.000408127	-1.63704
ILMN_1720461	SLC17A4	2.30764e-05	-1.63603
ILMN_1730625	AHSG	0.000372132	-1.63437
ILMN_2174127	DCBLD2	5.13179e-05	-1.63251
ILMN_2352090	GPRC5C	0.00442253	-1.63211
ILMN_1813275	DUSP22	5.02895e-05	-1.63028
ILMN_1789492	ZDHHC8	0.000787452	-1.63022
ILMN_1810725	FAM129A	0.00451334	-1.63003
ILMN_2410742	JMJD1C	1.46292e-05	-1.62868
ILMN_1675472	LOC644799	0.000453851	-1.62853
ILMN_1800311	HSF2	4.09876e-05	-1.62832
ILMN_1722533	KATNAL1	3.48026e-06	-1.62592
ILMN_1758173	TMEM99	1.38922e-05	-1.62575
ILMN_1716843	ELOVL2	7.99044e-05	-1.62499
ILMN_1741613	SERINC1	0.000133179	-1.62426
ILMN_2388800	PPAP2B	1.08534e-05	-1.6225
ILMN_1804935	VNN3	8.63501e-07	-1.62245
ILMN_1651680	LOC649150	0.000368631	-1.62106
ILMN_2228873	STARD3NL	4.92653e-06	-1.61881
ILMN_1713031	PGCP	2.27416e-05	-1.6186
ILMN_1748844	CNKSR3	0.000168335	-1.61858
ILMN_1783247	C10orf11	2.09068e-07	-1.61835
ILMN_3240222	PRAGMIN	0.00274436	-1.61825
ILMN_1795190	CLDN2	0.00362442	-1.61791
ILMN_1733690	AKAP7	8.68739e-07	-1.61688
ILMN_1724139	TMEM123	0.000122264	-1.61668
ILMN_1779855	HSD17B6	9.58358e-05	-1.61488
ILMN_1651950	TPST1	1.49427e-05	-1.61473
ILMN_1690999	MED23	0.00157273	-1.61472
ILMN_1731374	CPE	0.00176204	-1.61439
ILMN_2409167	ANXA2	1.7557e-05	-1.61424
ILMN_1758214	RARS2	3.88159e-06	-1.61284
ILMN_2408430	LARGE	0.000186227	-1.61207
ILMN_1656482	OSBPL2	1.10536e-05	-1.61102
ILMN_1687501	MOXD1	1.68159e-06	-1.61053
ILMN_1681777	SHROOM2	6.62288e-05	-1.60909
ILMN_1658885	DAGLB	0.00497744	-1.60809
ILMN_2208158	GTF2IP1	5.99518e-05	-1.60679
ILMN_2137789	KLF4	2.86253e-06	-1.60576
ILMN_1714741	LOC346887	2.3159e-06	-1.60536
ILMN_1722156	RWDD2A	5.48754e-07	-1.60437
ILMN_1806907	PAWR	0.000151212	-1.60354
ILMN_1675117	HSD17B11	0.00119704	-1.60349
ILMN_1815023	PIM1	0.00159514	-1.60329
ILMN_2384122	GPR56	0.000255955	-1.60318
ILMN_1652797	FAM174B	4.67171e-06	-1.60304
ILMN_1695604	DCBLD1	1.03177e-05	-1.60207
ILMN_2396875	IGFBP3	3.4045e-06	-1.60112
ILMN_2311989	CUTA	0.000800293	-1.59833
ILMN_1657750	CNNM1	7.22917e-05	-1.59794
ILMN_1738552	SLC1A3	2.76448e-05	-1.59745
ILMN_1772869	ISM1	1.68888e-05	-1.59717
ILMN_1700880	LOC648399	0.0013116	-1.59616
ILMN_1677098	YPEL2	0.00039527	-1.59556
ILMN_3299905	RNFT2	6.20804e-06	-1.59535
ILMN_1792301	LAMB4	7.01829e-07	-1.59447
ILMN_1720889	SC4MOL	3.61461e-05	-1.59362
ILMN_1694268	HES6	0.0017612	-1.59128
ILMN_1793743	DIRC2	1.25963e-07	-1.59088
ILMN_1757350	CTNNB1	0.000312869	-1.59035
ILMN_3233179	LOC728969	0.00192802	-1.58947
ILMN_2167011	ECHDC1	0.000800982	-1.58935
ILMN_2332964	LGMN	0.000143171	-1.58794
ILMN_1693932	LOC285733	0.000137122	-1.58652
ILMN_1776464	PARP4	0.0002266	-1.5861
ILMN_1696757	TTC14	6.12631e-07	-1.58552
ILMN_3200140	LOC645638	0.00012767	-1.58461
ILMN_1665235	CRTAP	0.000143578	-1.58448
ILMN_1681888	PRKAR2A	6.34235e-05	-1.58397
ILMN_1734895	SFT2D1	4.63333e-06	-1.58377
ILMN_1746396	CTNNB1	0.000517417	-1.58338
ILMN_3244096	ZFC3H1	6.84682e-06	-1.5823
ILMN_1731785	ORM2	0.000117193	-1.5819
ILMN_1680390	GCNT2	0.000680639	-1.58181
ILMN_2131861	SOCS2	7.22418e-05	-1.58123
ILMN_1813704	KIAA1199	1.0531e-05	-1.58118
ILMN_1738989	GOLSYN	1.67069e-05	-1.58057
ILMN_1734229	SPPL2A	2.79048e-06	-1.57992
ILMN_1720858	C6orf115	0.000153076	-1.57975
ILMN_3236239	LOC100129550	0.000570832	-1.57896
ILMN_3299558	SFRS18	1.34423e-05	-1.57829
ILMN_2386100	BUB3	3.99894e-05	-1.57739
ILMN_2342695	PDGFA	0.000884351	-1.57632
ILMN_1673409	MGC16121	0.00400212	-1.57632
ILMN_1659947	FGA	2.98087e-07	-1.57598
ILMN_1741159	MAP3K8	2.23243e-05	-1.5758
ILMN_1654939	TMED2	0.000125665	-1.57531
ILMN_1708782	MFAP3	3.65126e-05	-1.57519
ILMN_1775328	MTG1	0.000547979	-1.57506
ILMN_1690690	SEC23IP	5.83158e-05	-1.57491
ILMN_1652128	LMBRD1	0.000162399	-1.57463
ILMN_1763433	TRIM9	2.98098e-07	-1.57424
ILMN_1703006	MTCH1	0.00011554	-1.57299
ILMN_1678766	DYNLT1	0.000351603	-1.5718
ILMN_2409395	CCNC	2.35092e-05	-1.57165
ILMN_1726289	C12orf35	0.000310931	-1.57123
ILMN_1736190	CYP4F3	2.76004e-05	-1.57102
ILMN_1803392	TAX1BP3	0.000333197	-1.57059
ILMN_2337263	PKIB	8.60024e-05	-1.56956
ILMN_1680770	UBQLN2	1.46379e-05	-1.56828
ILMN_1796179	HIST1H2BK	0.000170348	-1.5681
ILMN_1792256	TBX2	0.00161082	-1.56793
ILMN_2169383	REG4	0.000115454	-1.56788
ILMN_1705346	NBEA	5.73945e-05	-1.56779
ILMN_3248649	LOC100134144	0.000337074	-1.56735
ILMN_1788160	KIF5B	1.14888e-05	-1.56661
ILMN_2309926	ZDHHC14	7.50457e-05	-1.56636
ILMN_1679641	FAM120B	0.00363201	-1.56622
ILMN_1708340	DAPK1	0.000132805	-1.5656
ILMN_1674924	PRR17	2.67631e-05	-1.56444
ILMN_1740171	DUSP11	0.000193426	-1.56328
ILMN_1676449	SLIT2	5.01875e-05	-1.56248
ILMN_1813741	KCNJ16	2.42944e-07	-1.56229
ILMN_1764764	MUM1	0.000327653	-1.56055
ILMN_1755649	SLC16A5	0.00294079	-1.55972
ILMN_3229424	LOC730101	0.00010314	-1.55861
ILMN_1742731	SLC35A2	0.000128041	-1.55854
ILMN_1807455	DHRS7	4.61955e-05	-1.55758
ILMN_1779147	ENC1	0.000152561	-1.557
ILMN_2070896	BMPR2	8.94814e-05	-1.55673
ILMN_3212284	LOC645693	2.3657e-05	-1.55662
ILMN_1796349	SMPDL3A	0.000306702	-1.5566
ILMN_3251207	TMEM19	0.000412186	-1.55638
ILMN_1714296	DNAH2	0.000162564	-1.55488
ILMN_1740523	KTN1	2.81644e-05	-1.55462
ILMN_1753411	LOC221442	2.54841e-05	-1.55449
ILMN_2119774	CYP2R1	2.05619e-05	-1.55148
ILMN_1669479	MEST	0.000118893	-1.55083
ILMN_2229922	C12orf35	0.00224818	-1.55032
ILMN_1785060	TSPAN14	0.000488653	-1.55031
ILMN_1726288	TMEM106B	0.000282936	-1.54973
ILMN_1680860	LEMD2	0.00108553	-1.54932
ILMN_1674334	LOC653354	7.29004e-06	-1.54824
ILMN_1770338	TM4SF1	0.00152146	-1.54823
ILMN_1803564	YIPF1	0.000205811	-1.54751
ILMN_1776788	C5orf41	0.000887949	-1.54722
ILMN_1806403	RASL12	0.00231131	-1.54625
ILMN_1654497	ATAD1	5.4159e-05	-1.54585
ILMN_1768110	ZAK	0.00040696	-1.54575
ILMN_1808768	ROCK1	8.26292e-05	-1.54445
ILMN_3271098	FAM176A	3.78602e-06	-1.54378
ILMN_2391765	C6orf48	4.36623e-05	-1.54368
ILMN_1752351	LAMP2	0.000187594	-1.5433
ILMN_1812967	CNPY3	0.00021247	-1.54327
ILMN_2364272	MBNL2	8.19602e-06	-1.54304
ILMN_2131381	PDE3B	1.16561e-05	-1.54297
ILMN_1695864	LOC652669	2.43888e-05	-1.54155
ILMN_1796119	ZUFSP	0.000425953	-1.53934
ILMN_3244248	TMEM14D	6.39281e-05	-1.53927
ILMN_2413158	PODXL	1.49957e-05	-1.53842
ILMN_1723467	ITGB1	0.000378929	-1.5381
ILMN_1714592	CDA	5.35537e-05	-1.53764
ILMN_1664010	ELF1	0.00026631	-1.53667
ILMN_1657399	RFX6	0.000221788	-1.53644
ILMN_1785265	PLS3	7.43195e-05	-1.53493
ILMN_1764970	JMJD1C	0.00107247	-1.53491
ILMN_1719343	WDR26	0.000797238	-1.53483
ILMN_1786976	RAB22A	0.00189063	-1.53419
ILMN_1739161	PPAP2A	3.02462e-05	-1.53354
ILMN_2052871	TMEM116	4.02999e-06	-1.53339
ILMN_1676728	DLK2	0.000142777	-1.53315
ILMN_1730575	GCLC	9.40537e-05	-1.53309
ILMN_1693620	PGM3	0.000130478	-1.53285
ILMN_1708611	RDX	0.00146562	-1.53285
ILMN_1669046	FOXQ1	0.00246772	-1.53224
ILMN_1759097	MLLT11	9.04729e-06	-1.53206
ILMN_3251440	PIK3C2A	0.000161427	-1.53195
ILMN_1675797	EPDR1	2.8067e-06	-1.53153
ILMN_1718063	LIPA	0.000786441	-1.53055
ILMN_1767837	GOLT1B	0.000131389	-1.53053
ILMN_1788108	TXNDC5	0.000305816	-1.52998
ILMN_1750967	ZKSCAN3	7.8992e-07	-1.52857
ILMN_2214678	MXD1	0.000168769	-1.52812
ILMN_1775743	BTG1	8.69204e-05	-1.52735
ILMN_1802096	ABTB1	0.000979703	-1.52609
ILMN_1766024	PDCD10	2.52519e-05	-1.52592
ILMN_1730998	TSPAN6	5.14853e-05	-1.52544
ILMN_1655307	FAM136A	0.00170507	-1.52404
ILMN_1769201	ELF3	6.44532e-05	-1.52259
ILMN_1754247	SLC3A1	7.10931e-06	-1.52232
ILMN_1708143	FAM127A	0.000121398	-1.52186
ILMN_3242900	HIST2H2AA4	5.81977e-05	-1.52041
ILMN_2087702	MYH9	4.84411e-05	-1.52016
ILMN_1718934	LOC728499	0.00160684	-1.51983
ILMN_1669502	E2F3	0.00141429	-1.51926
ILMN_1760982	ZNF187	0.000253757	-1.51894
ILMN_1737089	CAPN5	0.000157308	-1.51856
ILMN_1673752	C1orf91	4.46478e-05	-1.51849
ILMN_1748904	WTAP	0.000160789	-1.5178
ILMN_1806809	ZNF189	3.0431e-05	-1.51752
ILMN_2401933	ATP2B1	0.0025056	-1.51738
ILMN_1712888	HSPH1	0.00125007	-1.51562
ILMN_1656111	MYLIP	3.11495e-05	-1.51402
ILMN_2240866	MASP1	9.53412e-05	-1.51365
ILMN_1659766	BAG3	9.15045e-05	-1.51359
ILMN_2290118	MEGF9	0.000123566	-1.51274
ILMN_1813399	ATP2B1	0.0001585	-1.51244
ILMN_1728180	CROP	0.000589412	-1.51184
ILMN_1735058	CHST12	0.000238863	-1.51153
ILMN_2410826	OAS1	0.000149497	-1.51019
ILMN_1679318	ARSJ	6.78392e-05	-1.50993
ILMN_1667711	HRASLS3	4.07265e-05	-1.50992
ILMN_2376403	TSC22D3	0.000437684	-1.5094
ILMN_3289779	LOC100131471	0.000117635	-1.50879
ILMN_1788955	PDLIM1	0.00229954	-1.50855
ILMN_1777526	MED20	0.000213741	-1.50848
ILMN_2071937	ATP6V0E1	0.000522822	-1.50715
ILMN_1787251	DAAM1	0.000298193	-1.50692
ILMN_1710408	LGR4	0.000342077	-1.50583
ILMN_1707631	MED10	0.000645108	-1.50579
ILMN_1682799	STAMBPL1	3.39003e-05	-1.50569
ILMN_1807088	TTC33	0.000554273	-1.50477
ILMN_1686573	DEFB1	0.000883425	-1.50313
ILMN_2047599	TMEM50B	0.000668121	-1.50296
ILMN_2226955	VOPP1	0.000188025	-1.50249
ILMN_2329679	TPST2	0.000640952	-1.50193
ILMN_1752897	RPL23AP13	0.000856569	-1.50145
ILMN_2336647	NNT	0.00229483	-1.50133
ILMN_1713688	DHX32	0.00172231	-1.50102
ILMN_1749868	FAM171A1	0.00103156	-1.50083
ILMN_2211065	TMEM91	0.00102347	-1.50058
ILMN_2344850	VPS26A	0.000315811	-1.50055
ILMN_1775304	DNAJB1	2.52676e-05	-1.49996
ILMN_1705570	H2AFY2	0.000212689	-1.49853
ILMN_1725105	EEF1E1	2.49809e-05	-1.49805
ILMN_1768293	NUP155	3.92877e-06	-1.49782
ILMN_2261784	CCNY	0.00322875	-1.49693
ILMN_1673960	MAT2B	2.69596e-05	-1.49692
ILMN_2399304	NAV2	0.00451503	-1.4968
ILMN_1815552	NTAN1	0.000163024	-1.49653
ILMN_2052598	ARMC10	8.29991e-05	-1.4957
ILMN_1652409	SPATA7	0.000186386	-1.49567
ILMN_1686884	IL1RAP	0.000333909	-1.49549
ILMN_1812353	CSPP1	1.24356e-05	-1.49518
ILMN_1807503	CPA2	2.91878e-05	-1.49496
ILMN_1671116	C3orf21	0.000115745	-1.49496
ILMN_2230892	IL10RB	5.7213e-05	-1.49459
ILMN_1775522	MAGED1	1.17598e-05	-1.49456
ILMN_1723874	MRPS6	3.01037e-06	-1.49452
ILMN_1685679	RNF146	0.000117673	-1.49447
ILMN_1808494	ITIH2	0.000709123	-1.4944
ILMN_1767747	HDAC2	2.47972e-05	-1.49407
ILMN_1776076	POFUT1	0.000113814	-1.49395
ILMN_1730986	MALT1	1.77324e-05	-1.4939
ILMN_1667199	SQRDL	7.63085e-05	-1.49379
ILMN_1811238	ALPK2	4.18274e-05	-1.49352
ILMN_2063586	CLIC4	0.000489564	-1.49259
ILMN_1706483	C1orf116	5.07644e-07	-1.49235
ILMN_1713529	SEMA6A	3.24394e-07	-1.49224
ILMN_1740572	TCN2	0.000242496	-1.49212
ILMN_1766045	SH3GLB1	0.000231362	-1.49188
ILMN_2308950	AKAP12	1.52761e-05	-1.49159
ILMN_1698605	TMEM43	6.78437e-05	-1.49139
ILMN_1670903	NAT2	3.49443e-05	-1.49133
ILMN_1737146	TRAM1	2.68283e-05	-1.49063
ILMN_2321292	WIPI2	2.68352e-05	-1.49026
ILMN_1705066	BTBD11	8.75292e-05	-1.48986
ILMN_1689456	ZBTB20	0.000141718	-1.48878
ILMN_1769155	CYP2C8	2.95465e-06	-1.48725
ILMN_1667994	AMD1	5.63116e-06	-1.48478
ILMN_1694588	C4BPB	0.000234153	-1.4843
ILMN_1692177	TSC22D1	6.25597e-06	-1.48394
ILMN_1732831	CHST7	0.000191673	-1.48358
ILMN_1724700	RIOK3	0.0012052	-1.48355
ILMN_1698100	ANXA2P1	2.00266e-06	-1.4834
ILMN_1744949	RHOBTB3	0.000256905	-1.48322
ILMN_1737683	FGG	2.07649e-07	-1.48309
ILMN_1651964	ABCC5	3.17007e-05	-1.48266
ILMN_2279635	EIF4G2	0.00134517	-1.48199
ILMN_3251482	ALG10B	7.36148e-05	-1.48111
ILMN_1700695	SLC44A1	0.00183108	-1.48091
ILMN_1772123	ACACA	0.00127962	-1.48088
ILMN_1716922	DHX16	0.000887731	-1.48079
ILMN_3307221	NAV2	0.000238813	-1.48031
ILMN_1742431	LOC651309	0.00025109	-1.47994
ILMN_1678323	AASS	0.000123003	-1.47784
ILMN_1722872	MYH9	7.06315e-05	-1.4769
ILMN_1666512	SKIV2L	0.00010708	-1.47666
ILMN_1685580	CBLB	0.000289121	-1.47569
ILMN_2311278	ADD3	5.72668e-05	-1.47554
ILMN_3268472	CCL14	5.23537e-05	-1.47475
ILMN_1764500	C3orf10	0.00044681	-1.47325
ILMN_2347789	C4BPB	0.000794727	-1.47258
ILMN_1755937	ANXA2	2.70012e-05	-1.47221
ILMN_1795930	PTGER4	0.00034243	-1.47199
ILMN_1674506	MED23	2.19652e-06	-1.47169
ILMN_1745772	ASCC3	0.000467506	-1.47166
ILMN_1719344	LOC730820	0.000663024	-1.47148
ILMN_2397880	CSTF3	2.90309e-06	-1.47128
ILMN_1683271	TMSB4X	0.00308383	-1.47127
ILMN_2046470	DAAM1	0.000594267	-1.47115
ILMN_1678004	TMEM41B	0.000728072	-1.47108
ILMN_1740466	FAM46A	1.12053e-05	-1.47096
ILMN_1699574	NRP1	0.000144613	-1.47038
ILMN_1662741	EDG4	3.71609e-05	-1.47021
ILMN_2169439	ITGAV	9.32705e-05	-1.46987
ILMN_1672843	FBXO8	0.000395445	-1.46981
ILMN_1766079	SULT1C2	7.51864e-05	-1.46976
ILMN_1665686	FAM38B	1.91755e-05	-1.46931
ILMN_1756502	ISX	1.57043e-05	-1.46903
ILMN_1715814	LMAN1	0.000453048	-1.46863
ILMN_2402363	STK19	0.000815002	-1.46857
ILMN_1657632	ZMYM6	0.000904567	-1.46746
ILMN_1660661	TCP1	0.000600911	-1.46623
ILMN_1684771	PGRMC1	0.000387036	-1.46583
ILMN_1739840	LRRC8A	0.000278304	-1.4657
ILMN_1683023	PDGFC	0.00258892	-1.46522
ILMN_1661594	C2orf42	0.00138307	-1.46508
ILMN_2211728	GUCA1B	8.64428e-05	-1.46506
ILMN_2174612	CNOT8	0.000266172	-1.46502
ILMN_1789648	SCGN	2.09173e-05	-1.46431
ILMN_1691790	DACT2	0.00207667	-1.46427
ILMN_1655206	ZBTB34	0.000152961	-1.46364
ILMN_2146418	CRIM1	3.16476e-05	-1.4625
ILMN_2157219	AASS	0.000241771	-1.4619
ILMN_1768271	SMAP1	5.98081e-05	-1.46178
ILMN_1798108	C6orf211	0.000156386	-1.46166
ILMN_1796458	GABARAPL2	0.000373007	-1.46151
ILMN_1688606	RNFT1	0.00139468	-1.46087
ILMN_1812091	FAM20A	1.2309e-05	-1.46076
ILMN_1669015	XPNPEP1	6.44852e-05	-1.46041
ILMN_1692754	TMEM49	0.000161089	-1.46039
ILMN_1738632	PRKAR1A	0.00112461	-1.45932
ILMN_2307455	UBE2A	0.000135967	-1.45867
ILMN_1755051	EFHC1	8.11708e-05	-1.4583
ILMN_1787981	MFAP2	0.000385087	-1.45823
ILMN_2380237	C1QTNF1	0.000140478	-1.45782
ILMN_1730824	ZNF512	0.00035329	-1.45709
ILMN_1757827	ECOP	0.00084865	-1.45699
ILMN_1672503	DPYSL2	1.69216e-05	-1.45669
ILMN_1738239	RBM6	0.000143157	-1.4566
ILMN_1662129	RCN2	0.000207677	-1.45646
ILMN_1798164	PHF3	0.00062517	-1.45643
ILMN_2093231	WBP1	0.000116212	-1.45636
ILMN_2094360	NR2F2	0.000172072	-1.45616
ILMN_2262444	PDE7A	9.83039e-05	-1.45594
ILMN_1711919	SCYL2	0.00159911	-1.4557
ILMN_1791186	ARHGAP18	0.000370717	-1.45551
ILMN_1758941	REEP5	0.00241018	-1.45542
ILMN_3239771	DLGAP5	2.43703e-05	-1.45525
ILMN_3240524	MFSD6	0.00178908	-1.45514
ILMN_1682699	PBX2	0.00225902	-1.45439
ILMN_1787266	SPINK1	3.76765e-06	-1.45417
ILMN_1727617	XRN2	0.000894642	-1.45397
ILMN_1690325	NFYA	6.06257e-05	-1.45388
ILMN_2278653	ZNF493	0.00169328	-1.45349
ILMN_1705928	SNRNP200	0.000136484	-1.45345
ILMN_1681118	CAPRIN2	3.21455e-05	-1.45342
ILMN_1747744	LHFPL2	2.63891e-05	-1.45334
ILMN_1775016	MPZL2	1.92652e-07	-1.45327
ILMN_1782069	TRAK1	0.000112791	-1.45326
ILMN_1664922	FLNB	5.50363e-05	-1.45268
ILMN_2388585	GOPC	0.000284539	-1.45141
ILMN_2205963	C10orf54	8.74711e-05	-1.45126
ILMN_1671809	DUSP22	3.29596e-05	-1.45117
ILMN_1745573	TTC13	0.0001317	-1.451
ILMN_2052790	NONO	5.40352e-05	-1.45089
ILMN_1803939	YIPF6	0.0001888	-1.4508
ILMN_1663618	STAT3	0.000138878	-1.45067
ILMN_2285375	SORD	0.00019297	-1.45048
ILMN_1713756	GLUD1	0.00282745	-1.45012
ILMN_3241218	ANKIB1	1.62846e-05	-1.4499
ILMN_1658989	MEX3B	6.55321e-06	-1.44973
ILMN_1809889	CCDC117	0.00114011	-1.44966
ILMN_1768197	ROD1	5.65175e-06	-1.44938
ILMN_1788547	GCLM	0.00147956	-1.44913
ILMN_2205999	OSMR	2.70495e-05	-1.44907
ILMN_2357062	IL1RAP	3.5202e-05	-1.4483
ILMN_3244893	BAG2	0.00304642	-1.44794
ILMN_2175131	TMEM14C	0.000153895	-1.44784
ILMN_1695853	CLK4	0.000268379	-1.44751
ILMN_2308338	BMF	0.000353547	-1.44722
ILMN_1770548	CLASP2	0.000402562	-1.44658
ILMN_1722276	PAFAH1B1	0.00129878	-1.44634
ILMN_2411282	QSOX1	0.00395403	-1.44559
ILMN_2410986	STAT3	0.000231418	-1.4453
ILMN_1714349	GLCE	0.000949237	-1.4452
ILMN_1800733	MANBA	2.19456e-06	-1.44468
ILMN_2372398	ALDH5A1	0.000140934	-1.44417
ILMN_1683682	DAGLA	0.00411633	-1.44416
ILMN_1663489	UBR2	0.000179495	-1.44408
ILMN_1779163	C11orf67	4.0527e-05	-1.44322
ILMN_1769615	FLRT2	2.09917e-05	-1.44271
ILMN_1712431	FAM113B	0.000112617	-1.44144
ILMN_1670970	PPP3CA	0.00406998	-1.44144
ILMN_1681845	PAPD4	0.00137097	-1.44141
ILMN_3241524	ZBTB22	5.86144e-05	-1.44124
ILMN_1671891	PID1	0.00121545	-1.4412
ILMN_2188264	CYR61	1.45458e-05	-1.44119
ILMN_1679133	SERPINB1	0.00042696	-1.44101
ILMN_1727532	OLFML3	1.24717e-05	-1.44097
ILMN_2339825	YME1L1	2.49986e-05	-1.44035
ILMN_1652777	CDC42EP2	0.000290739	-1.44025
ILMN_1727740	SYNCRIP	0.000428053	-1.43991
ILMN_1692962	CTDSP2	5.92752e-06	-1.43978
ILMN_1801767	ABHD3	0.000614961	-1.43932
ILMN_1702073	ODF2L	0.000718549	-1.4393
ILMN_1801377	SLC29A4	0.00176635	-1.43899
ILMN_1661335	SPTBN1	0.00310252	-1.43888
ILMN_1730201	DTNA	0.000619391	-1.43871
ILMN_1716195	HIST1H2BG	4.81823e-05	-1.43849
ILMN_1691760	FAM45A	0.000363905	-1.43796
ILMN_1727790	KHDRBS3	0.000101735	-1.43792
ILMN_2104106	XPR1	0.000257323	-1.43743
ILMN_1804908	C14orf128	0.00034112	-1.43691
ILMN_1708427	KPNA3	0.00194197	-1.43659
ILMN_2148847	AKIRIN2	0.000512647	-1.43639
ILMN_2397721	GLB1	0.000138819	-1.43635
ILMN_1814924	FAM55C	8.83239e-07	-1.43619
ILMN_1678493	CHN1	0.000120317	-1.43604
ILMN_3241495	HULC	0.000763293	-1.43557
ILMN_2223805	TSGA14	0.000550241	-1.43551
ILMN_1749792	SORBS1	0.000429514	-1.4354
ILMN_1701753	LOC644063	0.00191577	-1.43507
ILMN_1782429	TMEM56	0.000756776	-1.43486
ILMN_1769520	UBE2L6	0.00314428	-1.43451
ILMN_1763265	CHMP1B	0.000212999	-1.43439
ILMN_1728471	ARFGEF1	4.54114e-05	-1.43434
ILMN_1676336	AADACL1	0.00159932	-1.43416
ILMN_1681628	ZNF277	0.000741049	-1.43414
ILMN_1749829	DLGAP5	0.00100095	-1.43412
ILMN_1784292	ANKMY2	3.20628e-05	-1.43333
ILMN_1791949	PGBD1	5.6164e-06	-1.43315
ILMN_1798030	XPR1	2.28036e-05	-1.4325
ILMN_1713978	SDF2	1.04338e-06	-1.43222
ILMN_1784602	CDKN1A	0.00420849	-1.43222
ILMN_3194638	FAM176A	1.07696e-05	-1.43158
ILMN_1774890	LAS1L	0.000646707	-1.43126
ILMN_2075436	PDIA3P	0.00205837	-1.431
ILMN_1689059	ZNF329	0.000232384	-1.4308
ILMN_1733248	NRBP2	8.2143e-05	-1.43052
ILMN_2195821	C5orf41	8.66266e-05	-1.42945
ILMN_1745491	UNC5CL	8.34571e-05	-1.42921
ILMN_1695880	LOX	0.000161652	-1.4291
ILMN_1799104	SPAG9	2.38475e-05	-1.42892
ILMN_2183856	TSPAN6	0.00116296	-1.42889
ILMN_1655316	PSMC6	0.000569347	-1.42868
ILMN_1747598	PPP1R11	0.00249886	-1.42836
ILMN_1789176	PSMB1	0.000286725	-1.42808
ILMN_2383077	SLC39A7	0.000131542	-1.42799
ILMN_2225608	FAM135A	0.00173986	-1.42772
ILMN_2325574	CASC4	0.00163234	-1.4276
ILMN_1797684	PDCD2	0.000122877	-1.42757
ILMN_1711928	FLJ20920	0.00280953	-1.42684
ILMN_1704139	DHRSX	4.2979e-06	-1.42677
ILMN_1781514	PCDH17	0.000418012	-1.42654
ILMN_1682929	SYTL2	1.53572e-05	-1.42651
ILMN_1799642	TRIM24	0.000302316	-1.42639
ILMN_1793371	KIAA0430	0.000388457	-1.42607
ILMN_1757026	MANEA	0.000317811	-1.42603
ILMN_3253901	HAVCR1	0.0001956	-1.42599
ILMN_1799139	PLOD2	0.000248856	-1.42577
ILMN_1656016	DHX9	5.51858e-05	-1.42564
ILMN_1710078	TMEM181	0.000261399	-1.42531
ILMN_2113535	PCYOX1	0.00303374	-1.42528
ILMN_2168314	PGM3	1.8206e-05	-1.42516
ILMN_2322552	NCKAP1	0.000549561	-1.42507
ILMN_3207122	LOC644563	0.0010868	-1.42499
ILMN_2117716	SFRS17A	0.000398918	-1.42492
ILMN_1690304	MGC26718	3.23244e-05	-1.42435
ILMN_1689869	GPR89C	1.41022e-06	-1.42434
ILMN_1759513	RND3	0.00132313	-1.4243
ILMN_1668027	LOC727762	0.000329272	-1.42371
ILMN_2052163	YIPF1	0.000235507	-1.42358
ILMN_2409451	NCKAP1	9.36003e-05	-1.42335
ILMN_1804448	MSI2	4.52603e-05	-1.42325
ILMN_3242462	UHRF1BP1	0.000397214	-1.42252
ILMN_2374692	WAC	0.0046192	-1.4225
ILMN_1723141	OTUD1	0.000135587	-1.42141
ILMN_1765409	STAM	3.19252e-05	-1.42139
ILMN_1774828	VEZT	0.000563201	-1.42138
ILMN_2046073	LCT	3.22954e-06	-1.42097
ILMN_1713682	FBXO11	0.000134354	-1.42082
ILMN_1702310	LGR5	0.000128065	-1.42055
ILMN_1755383	LRRC1	0.000216161	-1.42007
ILMN_3263974	KRT18P13	0.00173033	-1.41994
ILMN_1798804	SRPK1	0.00192874	-1.41994
ILMN_1667561	IFRD1	4.57908e-05	-1.41907
ILMN_1735155	GLB1	0.00106343	-1.41873
ILMN_2085362	FUCA2	0.000177114	-1.41777
ILMN_2329958	ABI1	0.0036471	-1.41716
ILMN_2161556	C12orf49	2.92081e-05	-1.41658
ILMN_1765641	SEMA3A	0.000279874	-1.41604
ILMN_1744980	ZCCHC7	0.000854674	-1.41537
ILMN_1729318	TOR1AIP1	4.11601e-05	-1.41519
ILMN_1792508	TMEM59	0.000183836	-1.41509
ILMN_3251742	ZNF322A	0.00117386	-1.41508
ILMN_1810127	ZNF789	4.58259e-05	-1.41501
ILMN_2232712	MYO10	0.00131869	-1.41498
ILMN_2380999	RECQL	1.09926e-05	-1.41464
ILMN_2062001	HOOK3	0.000936456	-1.41438
ILMN_1773643	SLC38A9	0.000135214	-1.4142
ILMN_1796245	DNASE2	7.3546e-05	-1.41403
ILMN_1730568	ZDHHC7	8.84634e-07	-1.41366
ILMN_1667893	TNS3	3.44389e-06	-1.41349
ILMN_3249669	HEATR5A	0.00142892	-1.413
ILMN_1705241	TDRD7	0.000373921	-1.41294
ILMN_2204876	FLVCR2	0.00197732	-1.41259
ILMN_2401641	ALDH3A2	0.00435648	-1.41245
ILMN_2326713	CD151	7.26556e-06	-1.41221
ILMN_1698001	NCK1	0.000382166	-1.41206
ILMN_1754727	GPRASP2	6.97558e-05	-1.41204
ILMN_2261076	NEDD9	0.000140134	-1.41199
ILMN_1768553	LOC283050	0.000264999	-1.41184
ILMN_1696946	LOC654174	4.17837e-05	-1.41183
ILMN_1741224	GPR137C	0.000758784	-1.41148
ILMN_1749838	MZF1	0.000726803	-1.41065
ILMN_1751887	PREP	3.50766e-05	-1.40901
ILMN_2118129	ITLN2	3.25824e-06	-1.40865
ILMN_1753500	ARHGAP12	0.00109656	-1.40837
ILMN_1688158	CYB5R4	0.000625567	-1.40832
ILMN_1707475	UBE2E2	0.000492822	-1.4081
ILMN_2136446	CTNNAL1	0.000276624	-1.4078
ILMN_1755727	KDM5B	1.65501e-05	-1.40762
ILMN_2213199	KIAA1712	2.16286e-05	-1.4076
ILMN_1669268	MEX3D	0.000384567	-1.40757
ILMN_1732404	C2orf15	6.48531e-05	-1.40746
ILMN_1676278	ABCC2	0.00138381	-1.4073
ILMN_1711102	B3GNT2	5.3268e-06	-1.40706
ILMN_2096405	WDR37	9.50259e-05	-1.40681
ILMN_1753608	TMEM131	0.000356202	-1.40674
ILMN_1660317	LEFTY1	1.14526e-07	-1.40665
ILMN_1691476	MYLK	2.27383e-05	-1.4064
ILMN_1695475	SEMA3C	0.000308393	-1.40614
ILMN_1782292	LAMP1	0.00034098	-1.40596
ILMN_2124386	RGL2	2.96126e-06	-1.40586
ILMN_1810962	PTPRK	0.000115996	-1.40579
ILMN_1691535	CUL4B	0.0005584	-1.4057
ILMN_1718610	ARHGAP17	0.0014433	-1.40555
ILMN_2323526	WAC	2.26895e-05	-1.40534
ILMN_1690708	SPTBN1	0.000302981	-1.40515
ILMN_1696568	ATP2C1	0.000442813	-1.40506
ILMN_2401878	DUSP10	2.08995e-05	-1.40454
ILMN_1738578	FILIP1L	1.63302e-05	-1.40446
ILMN_1735495	TBC1D8	0.00115561	-1.40316
ILMN_1712687	PAK2	0.000127808	-1.40303
ILMN_1804454	FAM135A	0.00194915	-1.40281
ILMN_1799853	SPTLC1	0.00025717	-1.40246
ILMN_1669516	ZNF193	1.1955e-05	-1.40176
ILMN_1691809	PSMA1	0.00211971	-1.40156
ILMN_1780861	LOC653506	0.000328363	-1.40146
ILMN_1810275	SLC7A7	0.00106016	-1.40068
ILMN_2220403	C6orf72	7.64668e-05	-1.40067
ILMN_1705814	KRT80	1.36448e-06	-1.40049
ILMN_1716057	CAPN2	0.000353344	-1.40046
ILMN_1781419	C11orf73	8.86333e-06	-1.40041
ILMN_1666924	PINK1	4.2525e-05	-1.40018
ILMN_1729269	LOC285074	0.00179095	-1.40006
ILMN_1751326	FAM162B	0.00336424	-1.40004
