# Supplementary material for: Mitochondrial Plasticity Promotes Resistance to Sorafenib and Vulnerability to STAT3 Inhibition in Human Hepatocellular Carcinoma
Source: Cancers (Basel). 2021 Nov 30;13(23):6029. doi: 10.3390/cancers13236029 (PMC8657239; doi:10.3390/cancers13236029)
Supplement: Supplementary file 1 [file cancers-13-06029-s001.zip › Supplementary table S2-Myc-Max target genes.xlsx]

## Sheet: Sheet1
Supplementary Table S2.
Putative Myc/Max targets among upregulated genes in sorafenib-resistant Huh7 cells
MYC_ENCODE	MYC_CHEA	MAX_ENCODE
POP7	CETN3	SRP19
RRP1	GPATCH4	POP7
PPAN	ECE2	NUP188
GPATCH4	RPS15	RRP1
RPL9	CHCHD5	PPAN
IPO4	CCND1	PEBP1
CHCHD4	RPL36AL	GPATCH4
RPS15	RPL36	PDCD2L
ALKBH2	RCC1	IPO4
PPAT	ZNF444	CHCHD4
ARHGDIA	CSRP2BP	ALKBH2
LONP1	SREBF1	RPL36AL
RPL36	USP48	PPAT
PIM3	SEC13	ARHGDIA
RPS7	RPS7	LONP1
METTL1	METTL1	PIM3
PUS1	MAP1S	METTL1
IMP4	PUS1	PUS1
PUS7	CAD	SLC35C2
ATAD3A	NME2	SLC35C1
SND1	AEN	CIRBP
ATXN2L	NME4	IMP4
DKC1	ATAD3A	PUS7
THAP7	GNL3	ATAD3A
NCL	ATXN2L	SND1
SNORD104	KCTD9	WDR77
MRTO4	DKC1	WDR81
GEMIN4	NCL	ADAM15
TAGLN2	MRTO4	DKC1
DUS3L	TLCD1	THAP7
ATF4	DCTPP1	NCL
SLBP	SLC25A11	SNORD104
INO80E	DUS3L	CLPP
AK2	SLBP	MRTO4
CDCA8	ZNF593	GEMIN4
LIAS	RPL12	TAGLN2
MRPL12	RPL36A	DUS3L
C17ORF96	SRM	SLBP
UQCRH	TBRG4	INO80E
DHX33	MNT	SHC1
NACC1	EIF4EBP1	NOP2
EIF4EBP1	PLTP	MYCBP2
PUSL1	EXOSC2	AK2
TBC1D17	ZBED4	CDCA8
LYAR	GOT2	WDR62
PPARGC1B	PA2G4	C17ORF96
YARS	PAICS	COMMD8
TRAP1	HNRNPAB	SOCS1
NOP14	HNRNPL	DHX33
NOP16	TFAP4	NACC1
CBX3	HOOK2	EIF4EBP1
MRPL27	LYRM7	PUSL1
PYCR1	PRPF31	TBC1D17
SNHG9	RNPS1	LYAR
B3GALT6	ABCE1	PPARGC1B
PA2G4	SSBP4	YARS
PAICS		TRAP1
MRPL24		NOP14
HNRNPL		PRELID1
GNL3L		NOP16
RNPS1		MRPL27
FARSA		PYCR1
C19ORF48		SNHG9
YWHAE		PA2G4
ACY1		PAICS
MCM8		NR4A2
FAF1		HNRNPL
ECE2		GNL3L
KRI1		RNPS1
SMG7		C19ORF48
RABEPK		YWHAE
WDR43		ACY1
MRPL1		MCM8
DBP		FAF1
UBE2Q1		CETN3
XPO4		ADAR
SNRNP70		ECE2
UTP14A		KRI1
TRIM65		SMG7
PELP1		RABEPK
CAD		WDR43
NME2		DUSP14
MRPS2		SPRED1
MRPS21		MRPL1
AEN		DBP
NUTF2		UBE2Q1
RAD23A		XPO4
JOSD2		UTP14A
WDR34		TRIM65
APRT		PELP1
GNL3		UPF2
QTRT1		KLF11
TRAF7		DFFA
C19ORF24		SPHK1
TLCD1		SIGMAR1
DCTPP1		CAD
ZNF598		NME2
MCM2		MRPS2
SNORA64		AEN
DDX28		RAD23A
SCARNA13		WDR34
SNORA16A		APRT
ZNF593		GNL3
RPL12		QTRT1
MAK16		C19ORF24
MRPS34		TLCD1
RPL36A		DCTPP1
SDAD1		ZNF598
PSMB10		RBKS
SRM		MCM2
TBRG4		SNORA64
FOXRED2		SCARNA13
EXOSC5		ZNF593
MNT		RPL12
POLD2		RAP1GDS1
RPL14		MAK16
METTL5		RPL36A
POLR2I		TIMM10
EXOSC2		SDAD1
NOP56		PSMB10
TAF12		SRM
SGTA		TBRG4
PPP2R3B		FOXRED2
HNRNPAB		EXOSC5
PER2		MNT
TFAP4		TDG
POLR3B		POLD2
SNORD68		RPL14
NFIC		METTL5
POLR3G		POLR2I
ABCE1		CNNM2
POLR3K		EXOSC2
		DCPS
		RNF130
		NOP56
		TAF12
		PTGES2
		SGTA
		MND1
		HNRNPAB
		PER2
		SLC25A38
		BOP1
		TFAP4
		POLR3B
		SNORD68
		TAOK2
		POLR3G
		ABCE1
		POLR3K
