# Supplementary material for: Mitochondrial Plasticity Promotes Resistance to Sorafenib and Vulnerability to STAT3 Inhibition in Human Hepatocellular Carcinoma
Source: Cancers (Basel). 2021 Nov 30;13(23):6029. doi: 10.3390/cancers13236029 (PMC8657239; doi:10.3390/cancers13236029)
Supplement: Supplementary file 1 [file cancers-13-06029-s001.zip › Supplementary table S3-SOX2 targets.xlsx]

## Sheet: Supplementary table S5-SOX2 tar
Supplementary Table S3.
Putative SOX2 targets among downregulated genes in sorafenib-resistant Huh7 cells
SOCX2_CHEA
DIDO1
BTG1
DEFB1
OLFML2A
CYR61
GJA1
NNT
ENC1
TRIM24
ARL6IP5
PLS3
ITGAV
JARID2
TNS3
HIST1H1C
LEFTY1
ABCC5
TNFRSF19
ARID5B
RNASE4
NAV2
PTGR1
DKK1
ZDHHC14
MAP1B
PPAP2B
PPAP2A
XRN2
HIST1H2BG
TRIB1
PPIC
AHNAK
HIST1H2BJ
SEMA3A
CSTF3
PDGFA
MAT2B
ARHGAP12
SOCS2
PDLIM1
PODXL
LARGE
PDGFC
STK38
BMF
GPC4
MAP4K4
ARFGEF1
SPAG9
FZD2
DTNA
MYO10
GAD1
STAT3
SCD5
CRIM1
SORBS1
MLLT11
BMP4
H2AFY2
GSTA4
BAMBI
CTNNB1
VIM
CD24
LGR4
YPEL2
